# Supplementary material for: Preventive Home Visits for Mortality, Morbidity, and Institutionalization in Older Adults: A Systematic Review and Meta-Analysis
Source: PubMed Central journal article supplement (PMC3951196; doi:10.1371/journal.pone.0089257), 2014-03-12

## Figure S5: Results for each follow-up interval, longest follow-up, and subgroup analyses

### Analyses included

- Analysis 1: ER (number); results at longest follow-up
- Analysis 2: ER (number); at each follow-up interval
- Analysis 3: ER (number); focus of visit subgroups
- Analysis 4: ER (number); age of participants subgroups
- Analysis 5: ER (number); type of visitor subgroups
- Analysis 6: ER (number); number of visits subgroups
- Analysis 7: ER (people); results at longest follow-up
- Analysis 8: ER (people); at each follow-up interval
- Analysis 9: ER (people); focus of visit subgroups
- Analysis 10: ER (people); age of participants subgroups
- Analysis 11: ER (people); type of visitor subgroups
- Analysis 12: ER (people); number of visits subgroups
- Analysis 13: Falls (number); results at longest follow-up
- Analysis 14: Falls (number); at each follow-up interval
- Analysis 15: Falls (number); focus of visit subgroups
- Analysis 16: Falls (number); age of participants subgroups
- Analysis 17: Falls (number); type of visitor subgroups
- Analysis 18: Falls (number); number of visits subgroups
- Analysis 19: Falls (people) at each follow-up interval
- Analysis 20: Falls (people); focus of visit subgroups
- Analysis 21: Falls (people); age of participants subgroups
- Analysis 22: Falls (people); type of visitor subgroups
- Analysis 23: Falls (people); number of visits subgroups
- Analysis 24: Falls (subjective), results at longest follow-up
- Analysis 25: Falls (subjective) at each follow-up interval
- Analysis 26: Falls (subjective); focus of visit subgroups
- Analysis 27: Falls (subjective); age of participants subgroups
- Analysis 28: Falls (subjective); type of visitor subgroups
- Analysis 29: Falls (subjective); number of visits subgroups
- Analysis 30: Functioning ADL/IADL at each follow-up interval
- Analysis 31: Functioning ADL/IADL; focus of visit subgroups
- Analysis 32: Functioning ADL/IADL; age of participants subgroups
- Analysis 33: Functioning ADL/IADL; type of visitor subgroups
- Analysis 34: Functioning ADL/IADL; number of visits subgroups
- Analysis 35: Cognitive functioning, results at longest follow-up
- Analysis 36: Quality of life at each follow-up interval
- Analysis 37: Quality of life; focus of visit subgroups
- Analysis 38: Quality of life; age of participants subgroups
- Analysis 39: Quality of life; type of visitor subgroups
- Analysis 40: Quality of life; number of visits subgroups
- Analysis 41: Hospitalisation Admissions, results at longest follow-up
- Analysis 42: Hospitalisation Admissions at each follow-up interval
- Analysis 43: Hospitalisation Admissions; focus of visit subgroups
- Analysis 44: Hospitalisation Admissions; age of participants subgroups
- Analysis 45: Hospitalisation Admissions; type of visitor subgroups
- Analysis 46: Hospitalisation Admissions; number of visits subgroups
- Analysis 47: Hospitalisation (days), results at longest follow-up
- Analysis 48: Hospitalisation (days) at each follow-up interval
- Analysis 49: Hospitalisation (days); focus of visit subgroups
- Analysis 50: Hospitalisation (days); age of participants subgroups
- Analysis 51: Hospitalisation (days); type of visitor subgroups
- Analysis 52: Hospitalisation (days); number of visits subgroups
- Analysis 53: Hospitalisation (people) at each follow-up interval
- Analysis 54: Hospitalisation (people); focus of visit subgroups
- Analysis 55: Hospitalisation (people); age of participants subgroups
- Analysis 56: Hospitalisation (people); type of visitor subgroups
- Analysis 57: Hospitalisation (people); number of visits subgroups
- Analysis 58: Injuries (number), results at longest follow-up
- Analysis 59: Injuries (people), results at longest follow-up
- Analysis 60: Injuries (people) at each follow-up interval
- Analysis 61: Injuries (people); focus of visit subgroups
- Analysis 62: Injuries (people); age of participants subgroups

Analysis 63: Injuries (people); type of visitor subgroups  
Analysis 64: Injuries (people); number of visits subgroups  
Analysis 65: Institutionalisation (days), results at longest follow-up  
Analysis 66: Institutionalisation (people) at each follow-up interval  
Analysis 67: Institutionalisation (people); focus of visit subgroups  
Analysis 68: Institutionalisation (people); age of participants subgroups  
Analysis 69: Institutionalisation (people); type of visitor subgroups  
Analysis 70: Institutionalisation (people); number of visits subgroups  
Analysis 71: Mortality (Focus of visits subgroups)  
Analysis 72: Mortality; age of participants subgroups  
Analysis 73: Mortality; type of visitor subgroups  
Analysis 74: Mortality; number of visits subgroups  
Analysis 75: Psychiatric (anxiety and depression), results at longest follow-up  
Analysis 76: Psychiatric (anxiety and depression) at each follow-up interval  
Analysis 77: Psychiatric (anxiety and depression); focus of visit subgroups  
Analysis 78: Psychiatric (anxiety and depression); age of participants subgroups  
Analysis 79: Psychiatric (anxiety and depression); type of visitor subgroups  
Analysis 80: Psychiatric (anxiety and depression); number of visits subgroups

### Analysis 1: ER (number); results at longest follow-up

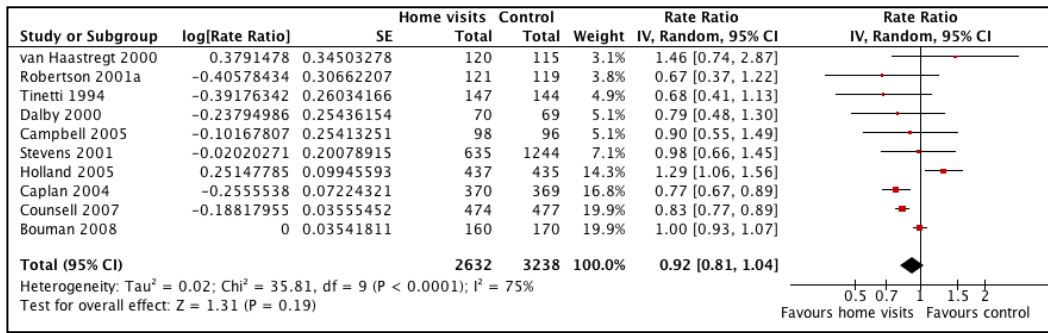

### Analysis 2: ER (number); at each follow-up interval

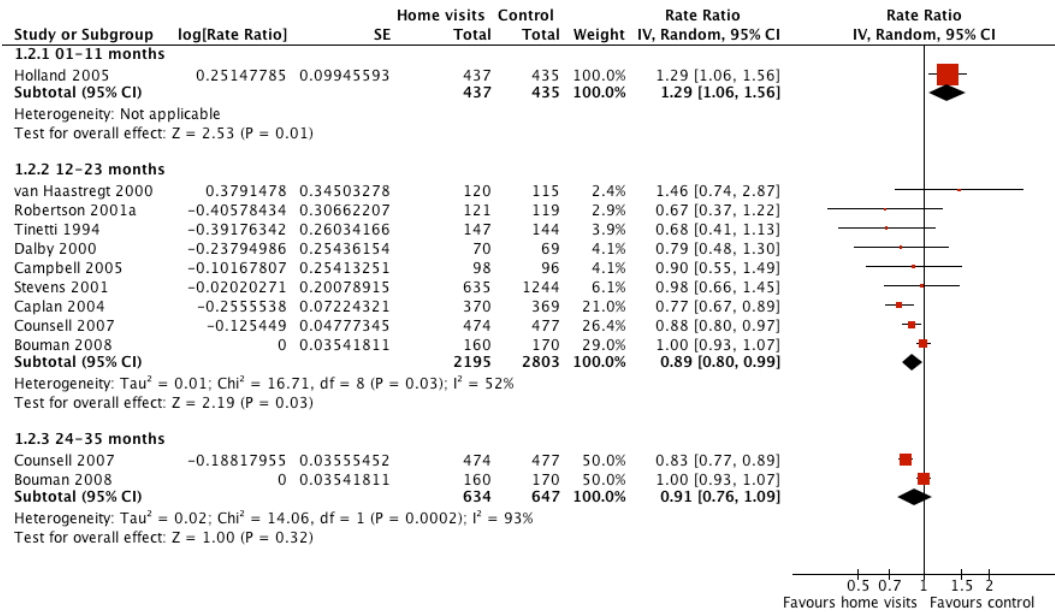

### Analysis 3: ER (number); focus of visit subgroups

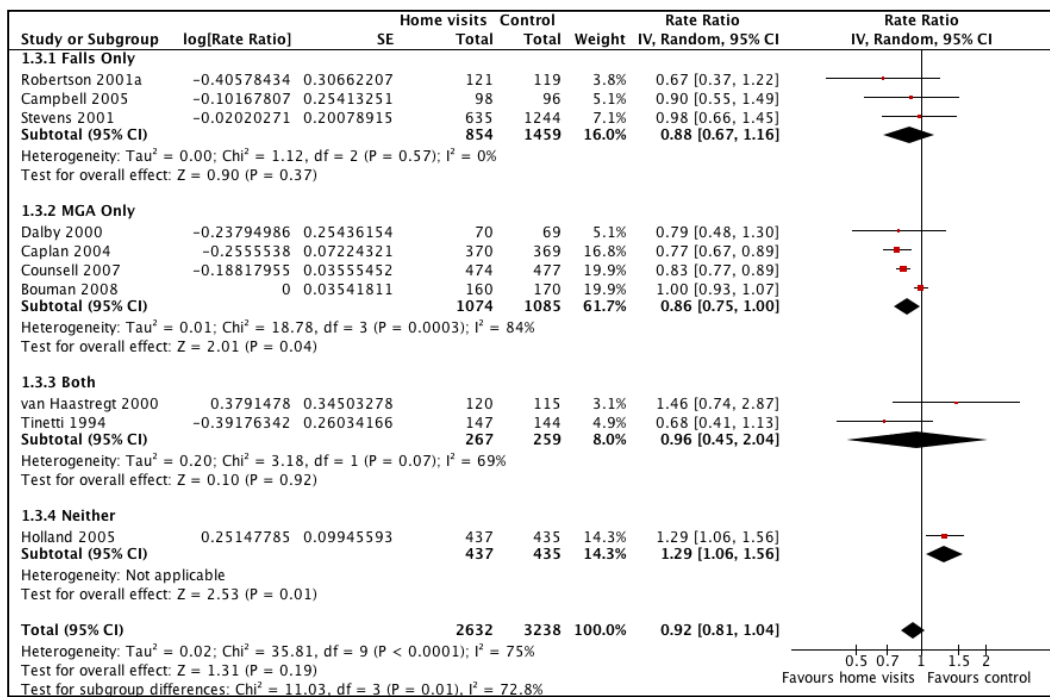

### Analysis 4: ER (number); age of participants subgroups

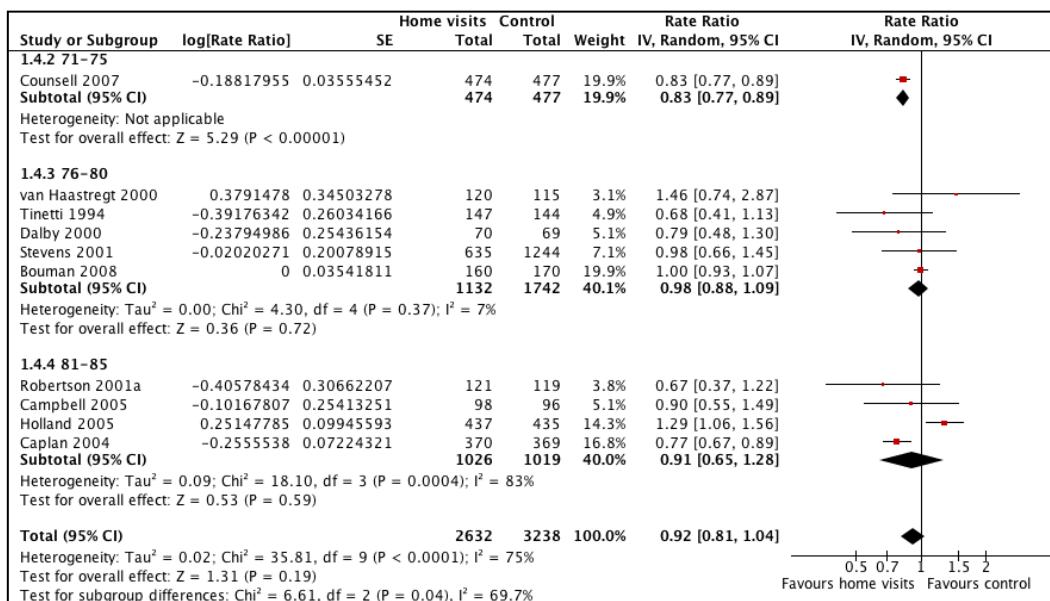

### Analysis 5: ER (number); type of visitor subgroups

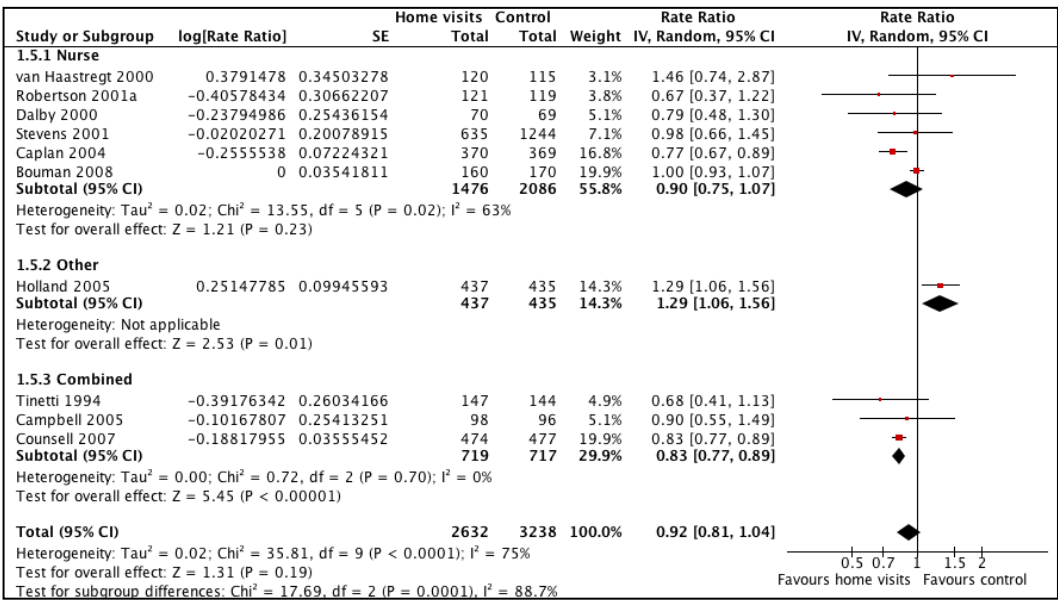

### Analysis 6: ER (number); number of visits subgroups

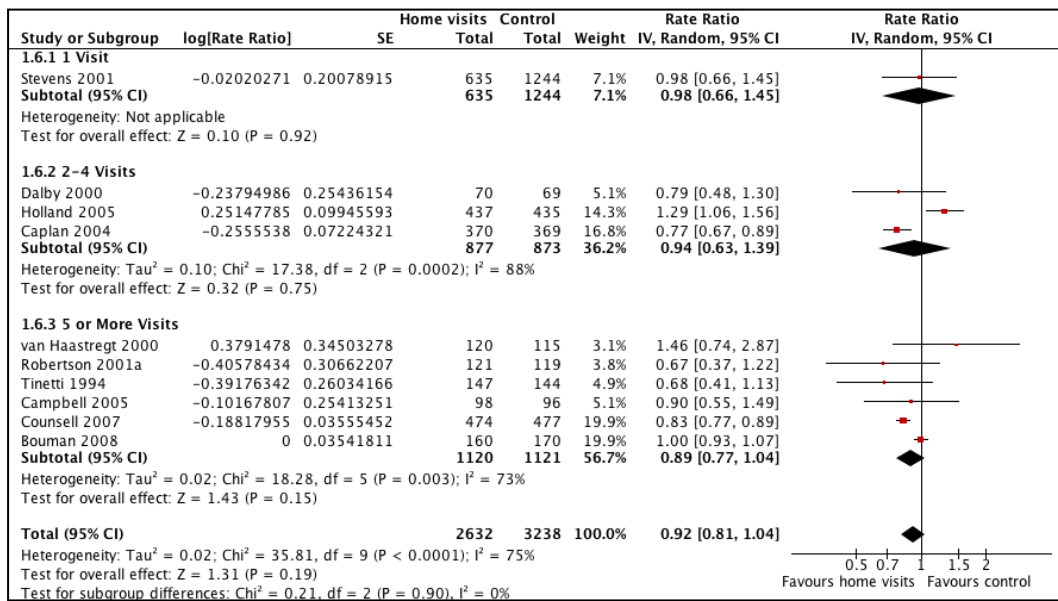

### Analysis 7: ER (people); results at longest follow-up

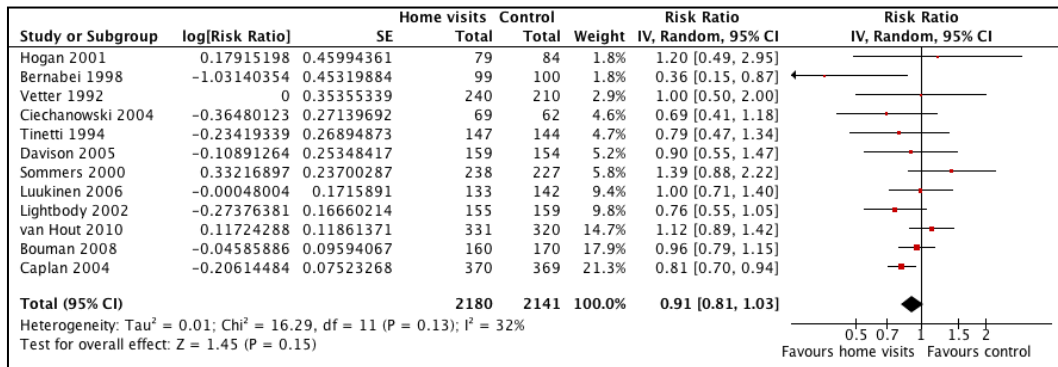

### Analysis 8: ER (people); at each follow-up interval

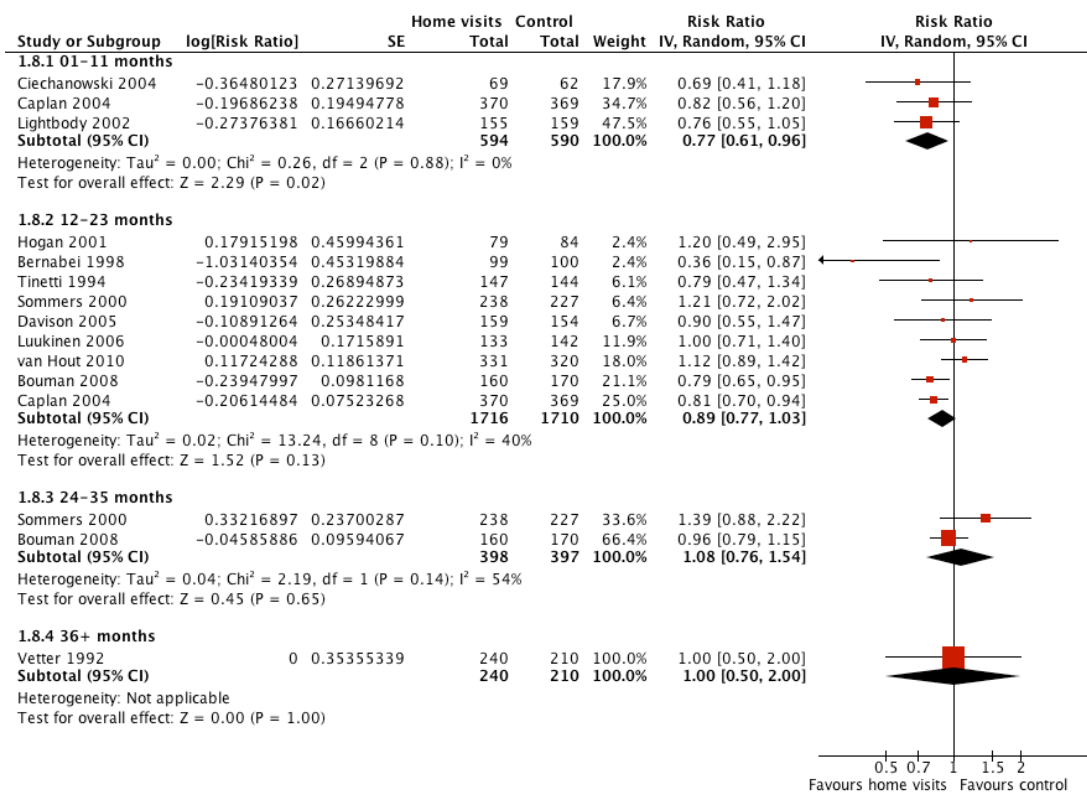

### Analysis 9: ER (people); focus of visit subgroups

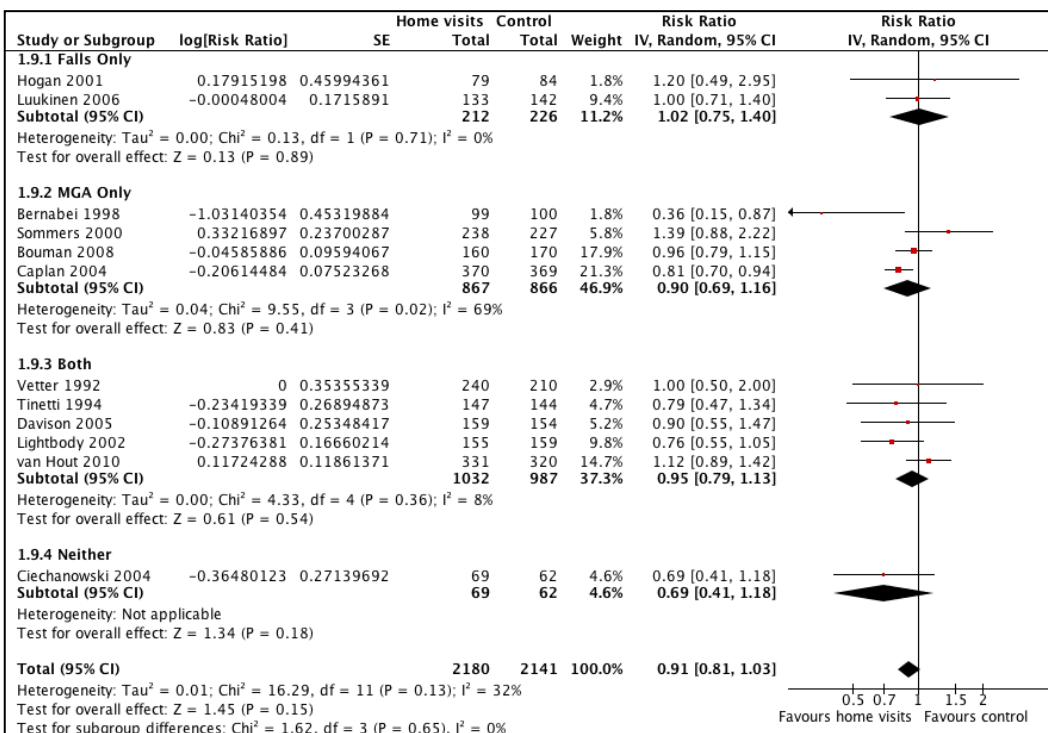

## Analysis 10: ER (people); age of participants subgroups

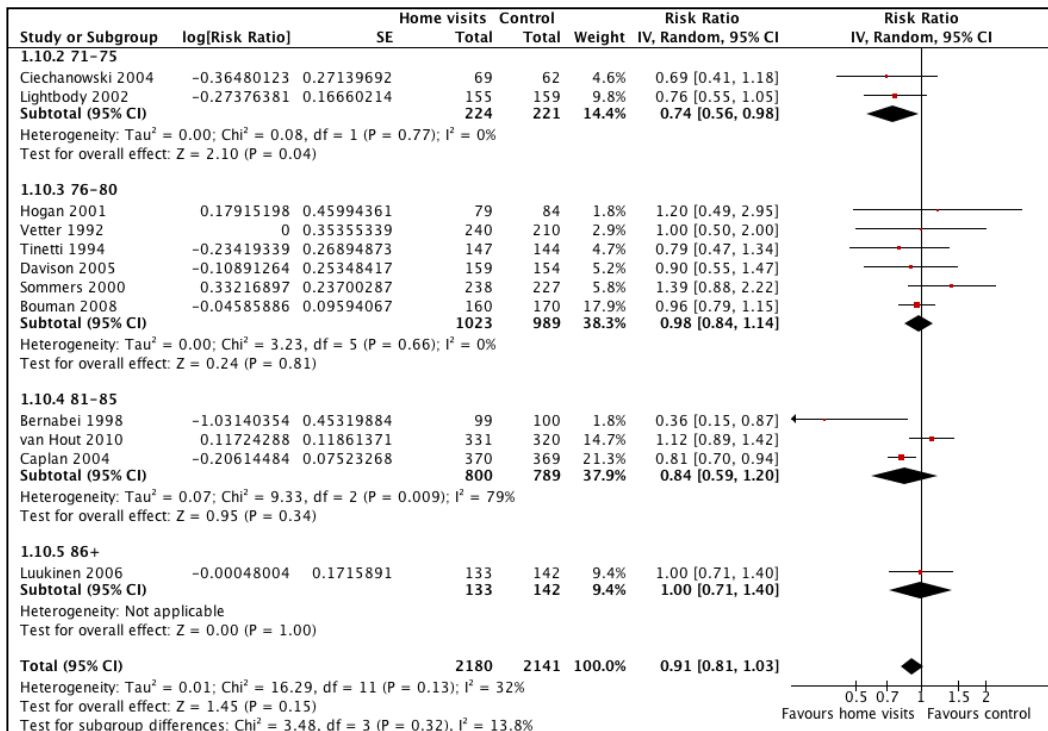

## Analysis 11: ER (people); type of visitor subgroups

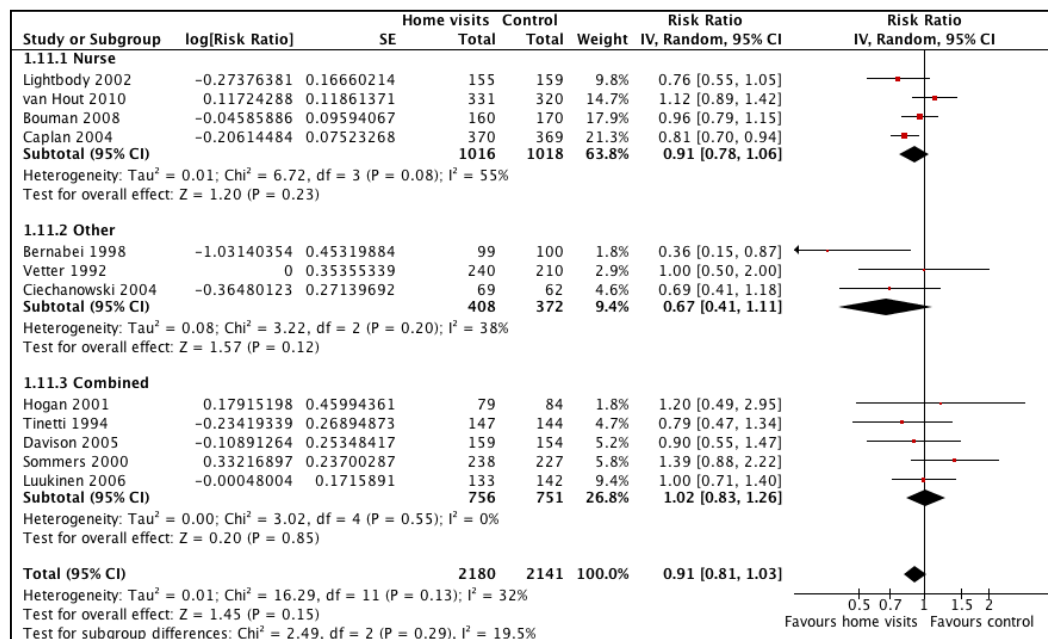

### Analysis 12: ER (people); number of visits subgroups

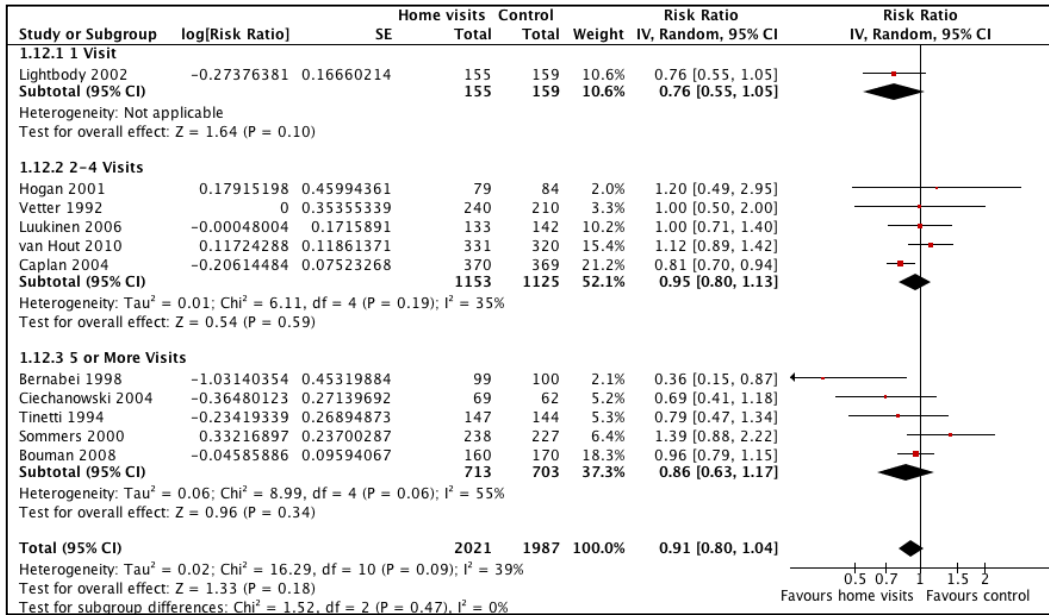

### Analysis 13: Falls (number); results at longest follow-up

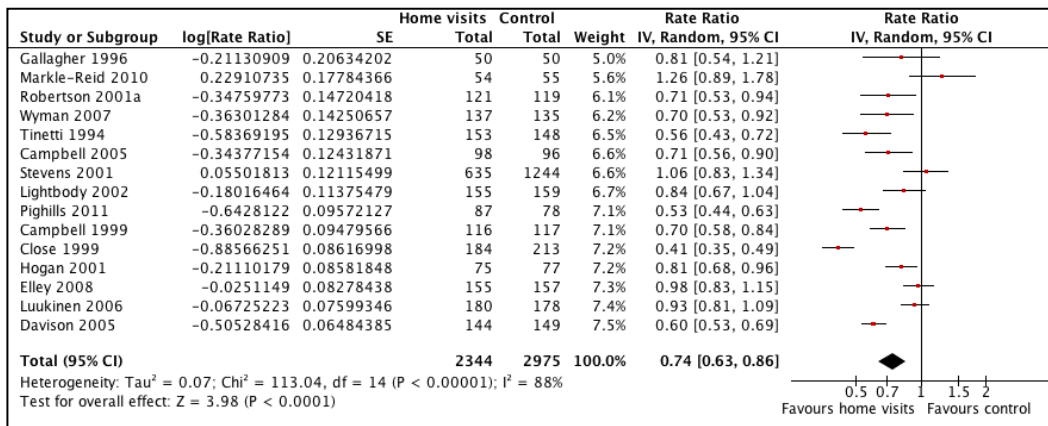



### Analysis 14: Falls (number); at each follow-up interval

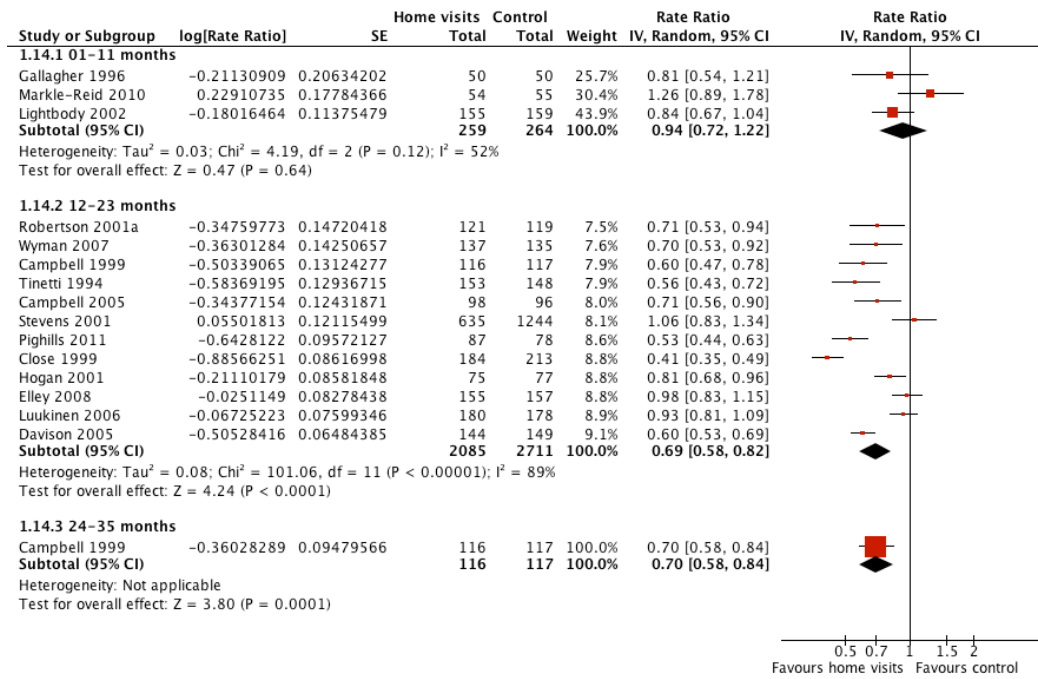

### Analysis 15: Falls (number); focus of visit subgroups

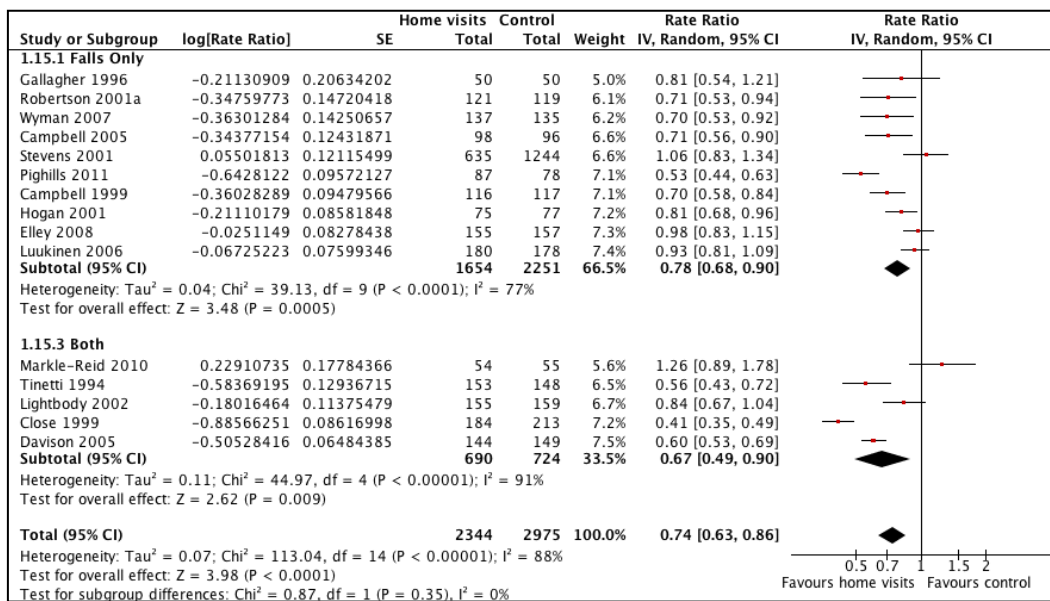

## Analysis 16: Falls (number); age of participants subgroups

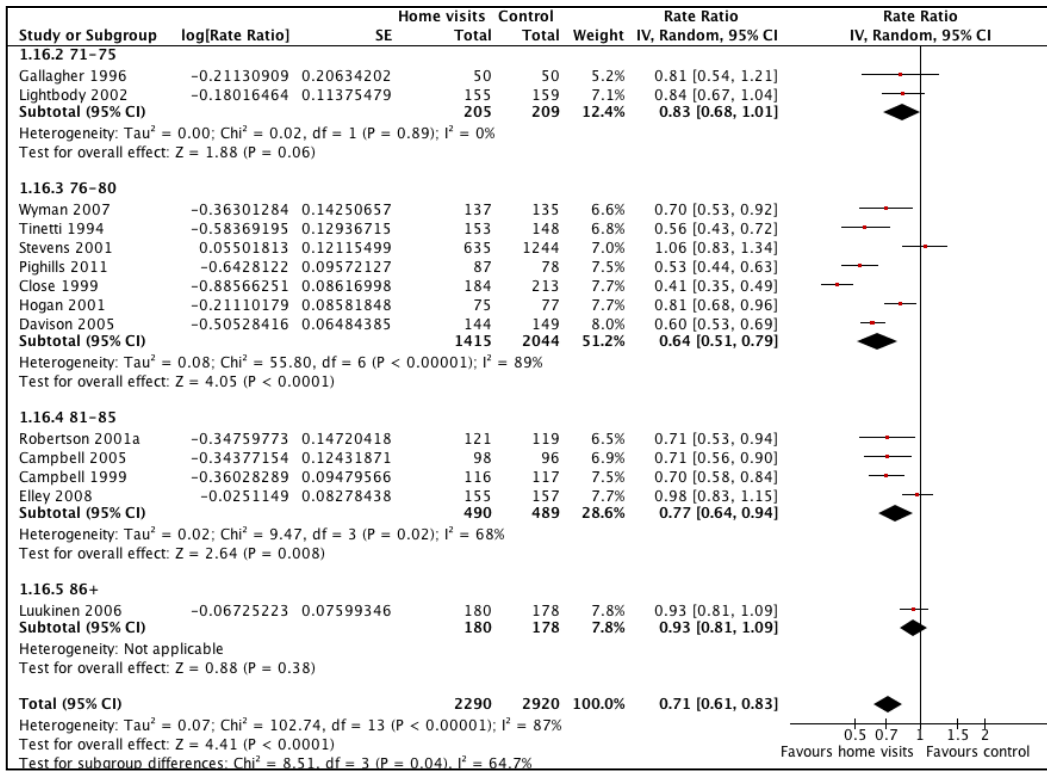

## Analysis 17: Falls (number); type of visitor subgroups

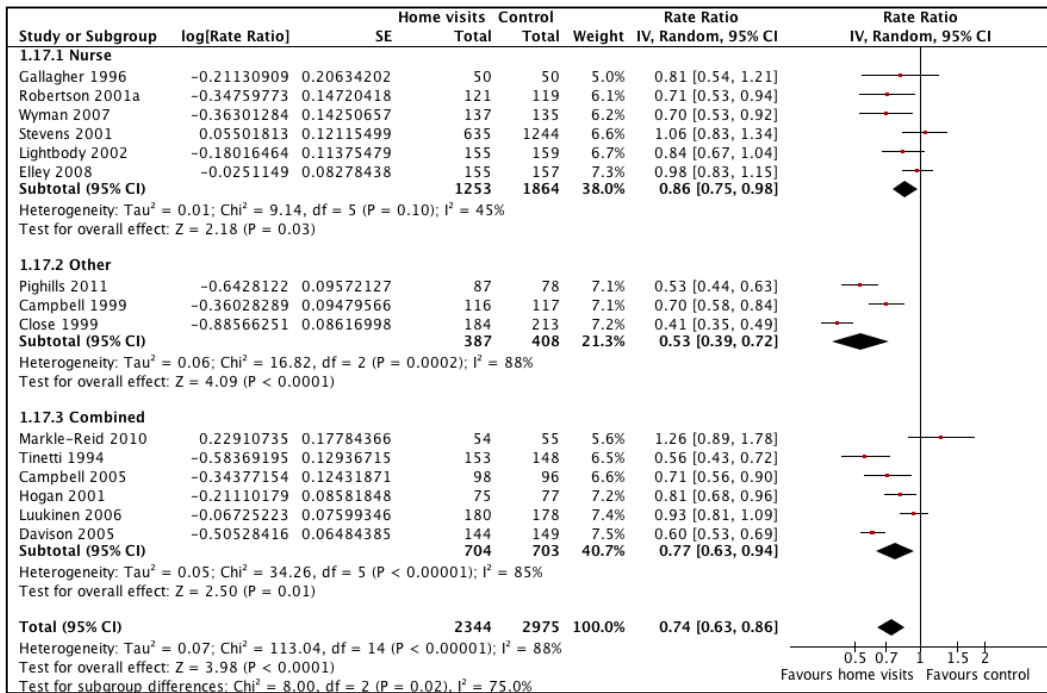

### Analysis 18: Falls (number); number of visits subgroups

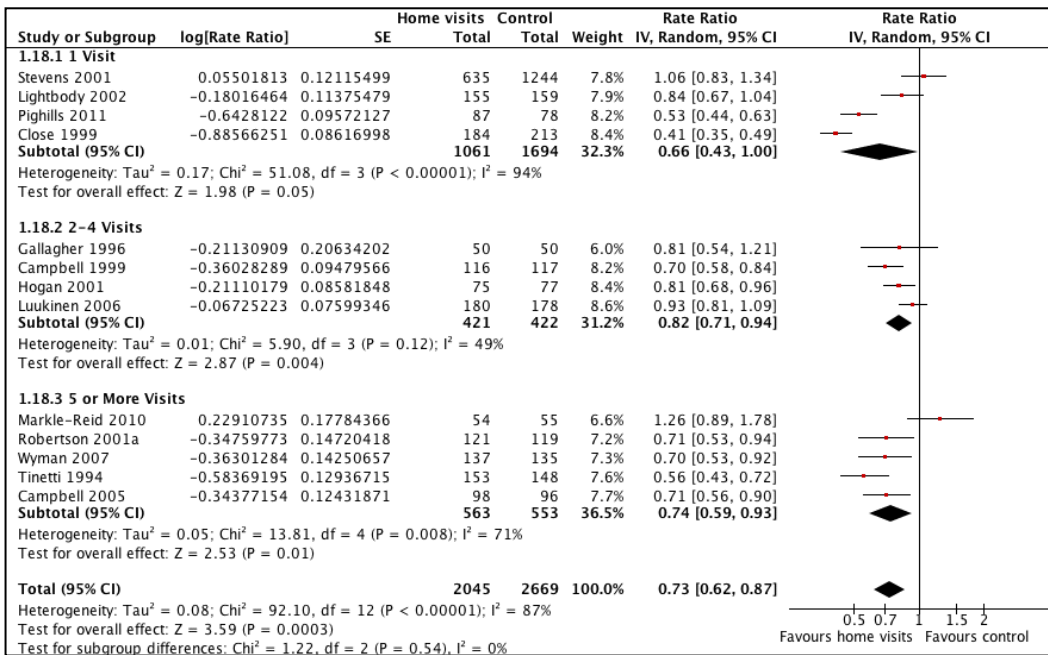

### Analysis 19: Falls (people) at each follow-up interval

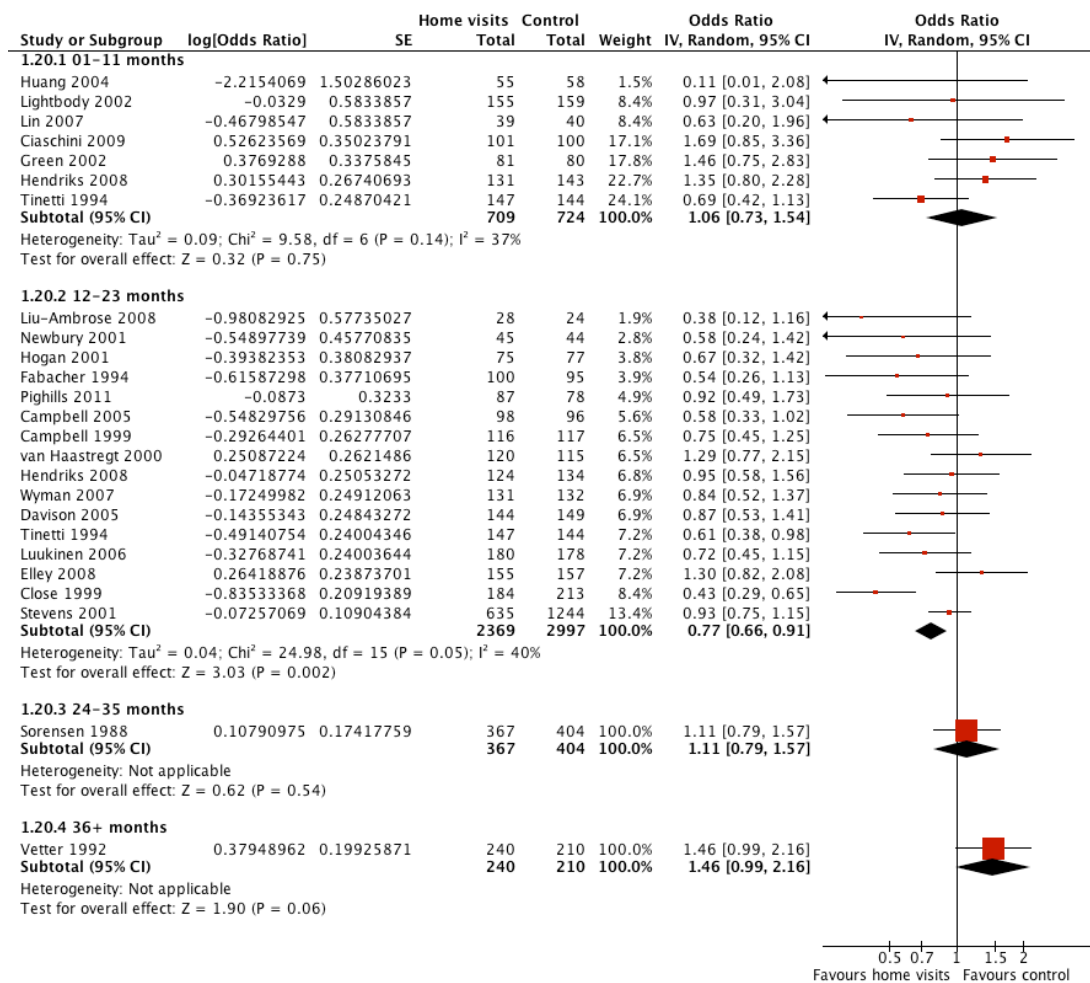

## Analysis 20: Falls (people); focus of visit subgroups

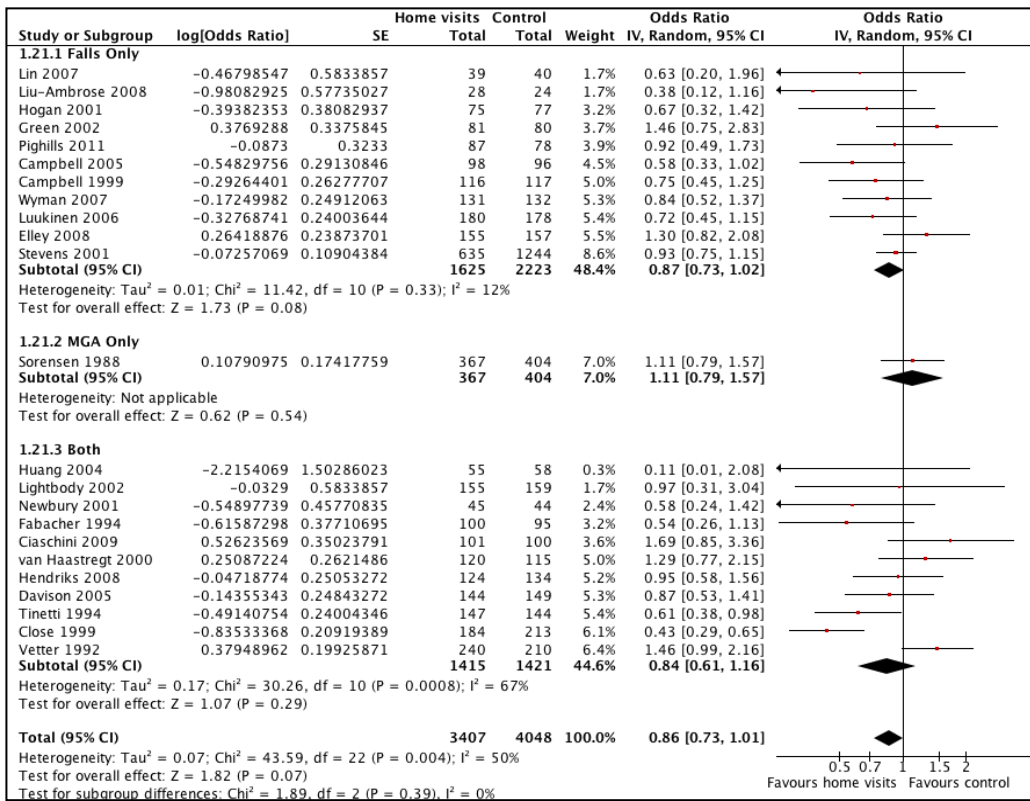

## Analysis 21: Falls (people); age of participants subgroups

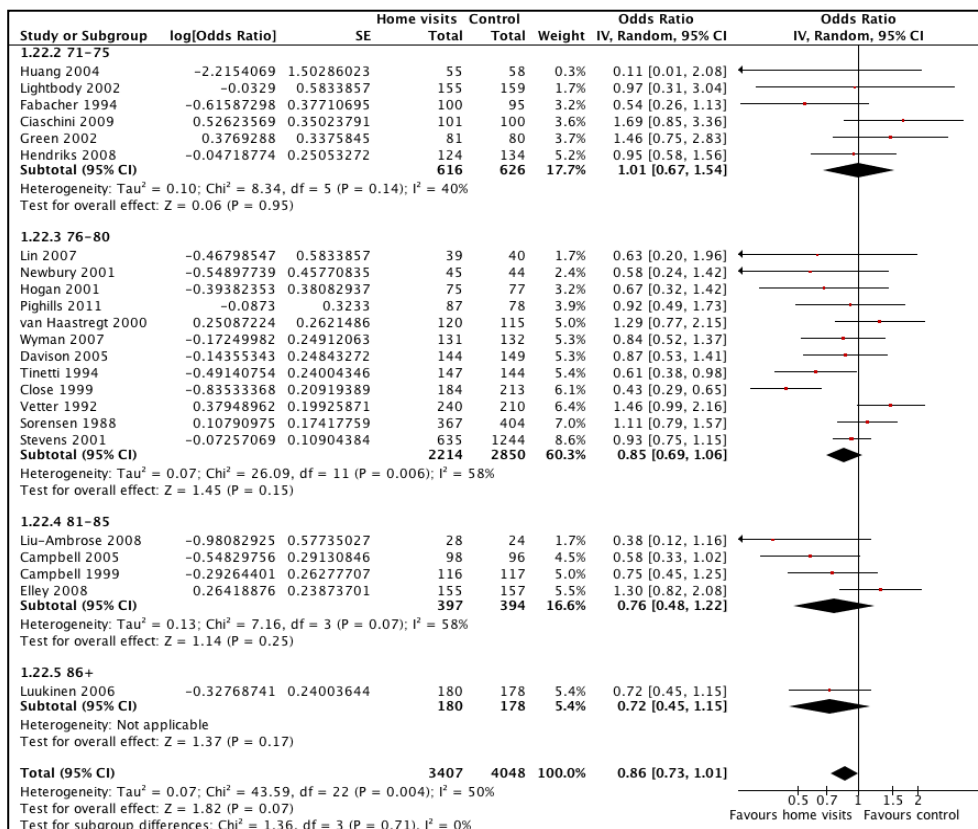

## Analysis 22: Falls (people); type of visitor subgroups

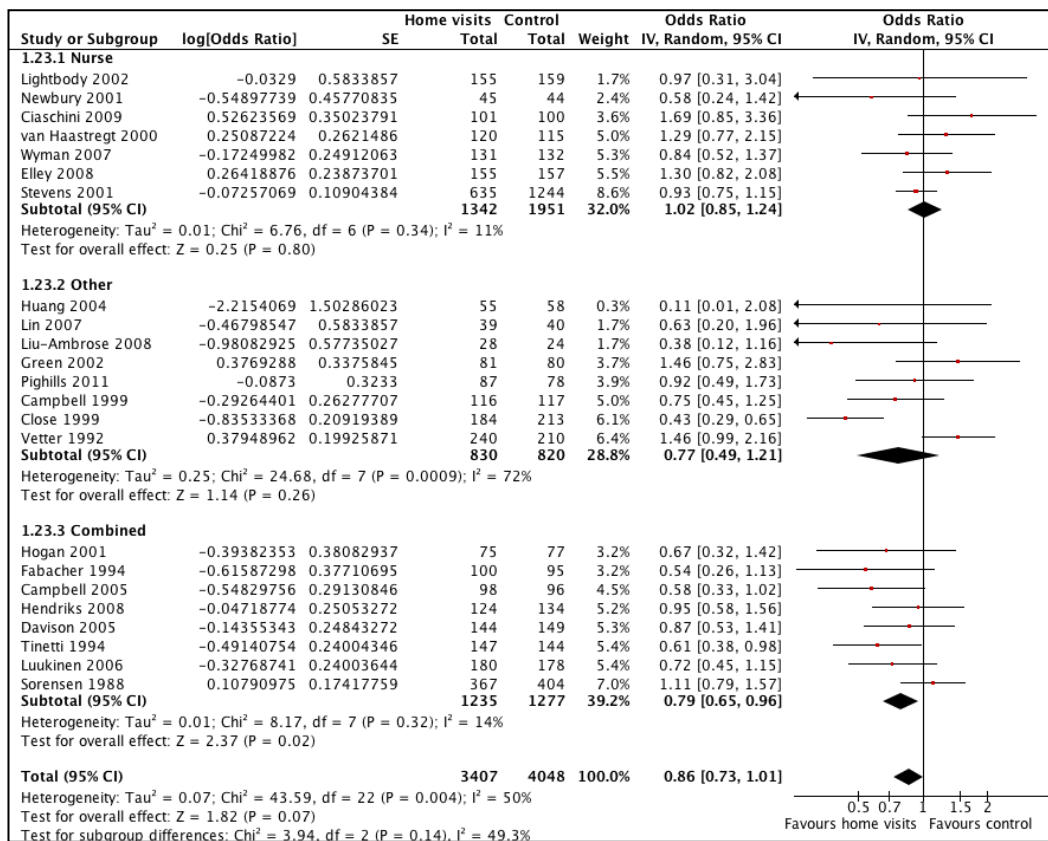

## Analysis 23: Falls (people); number of visits subgroups

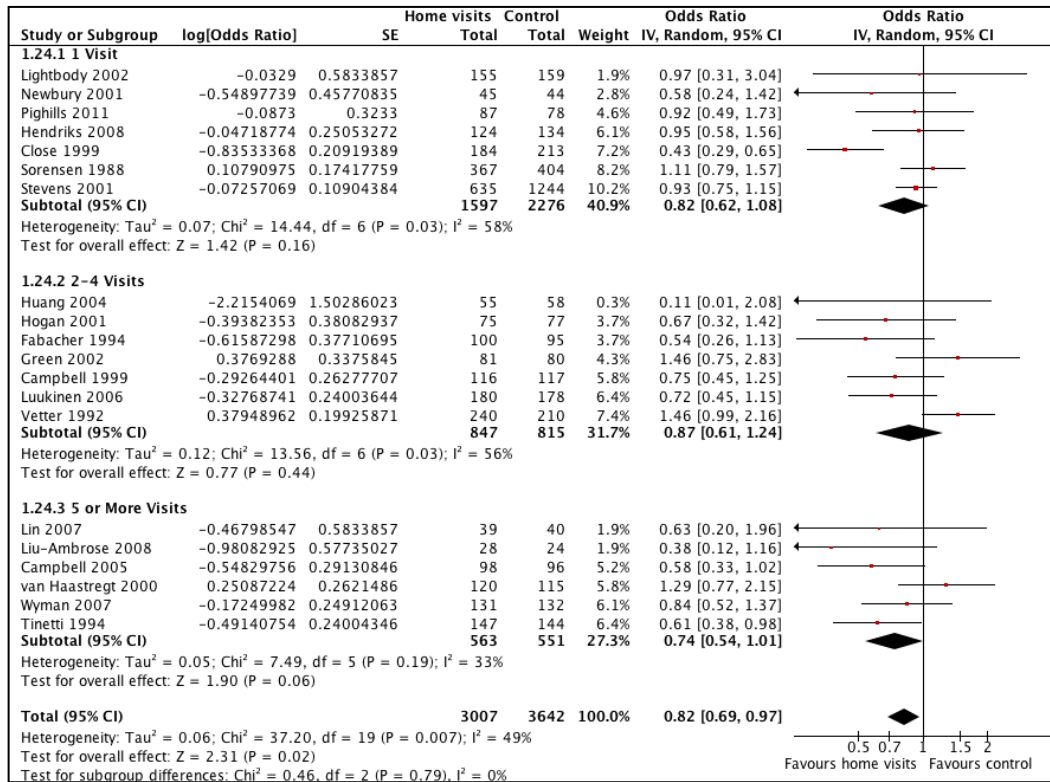

## Analysis 24: Falls (subjective), results at longest follow-up

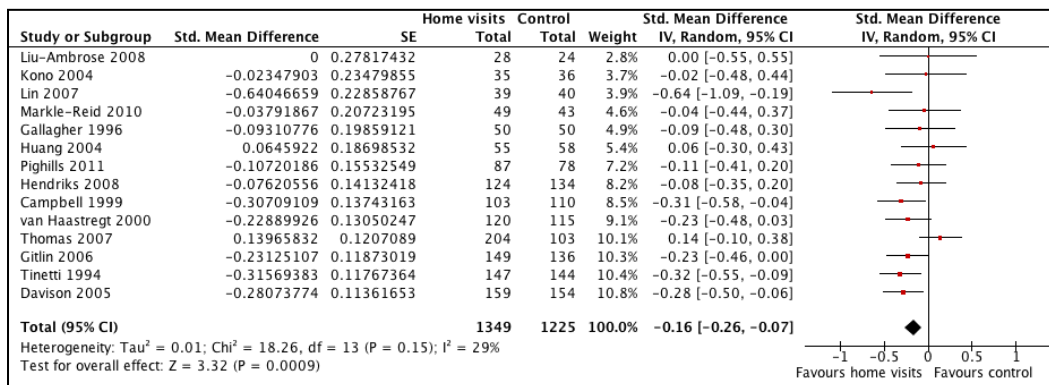

## Analysis 25: Falls (subjective) at each follow-up interval

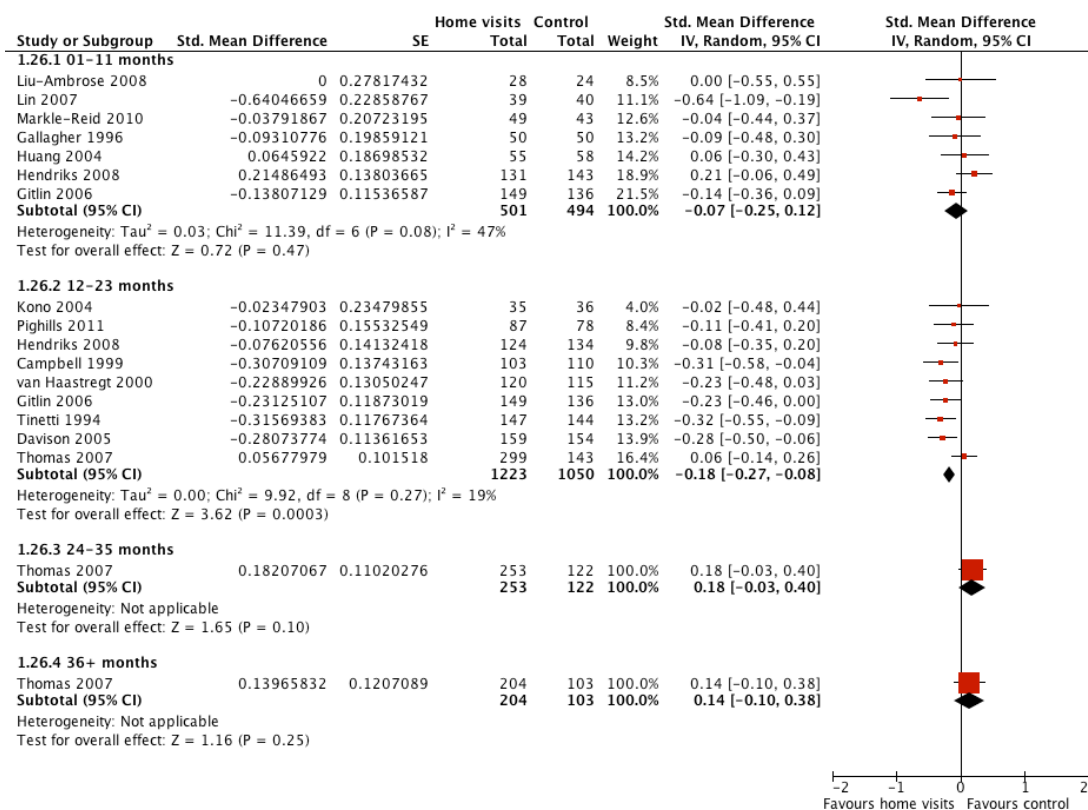

## Analysis 26: Falls (subjective); focus of visit subgroups

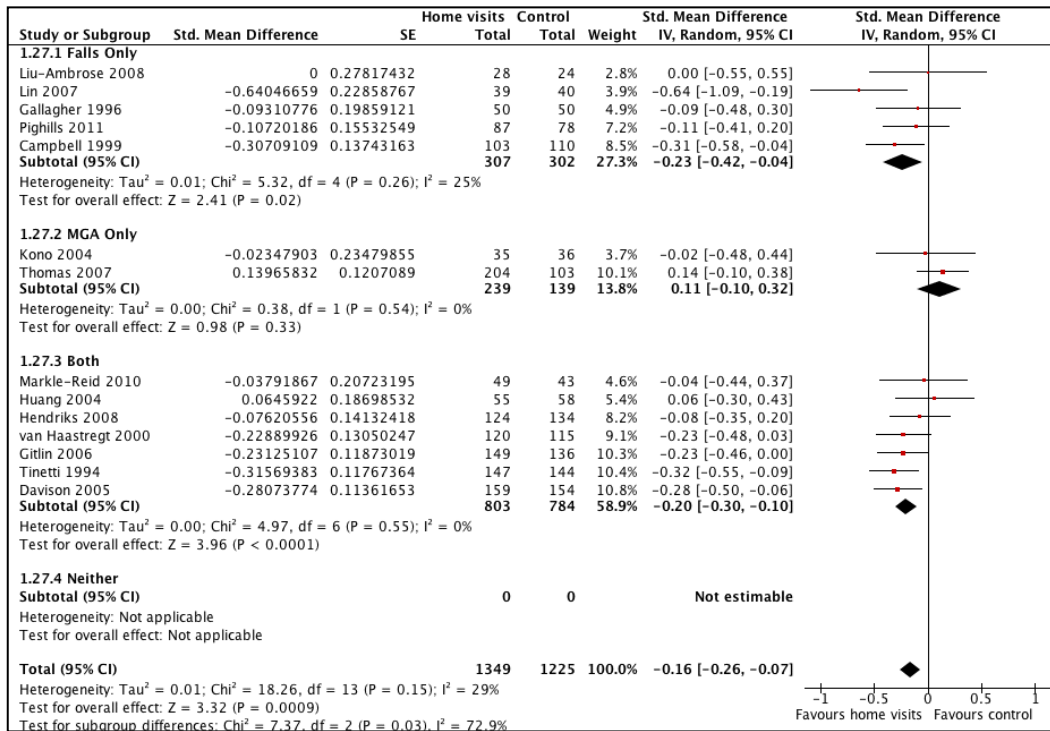

## Analysis 27: Falls (subjective); age of participants subgroups

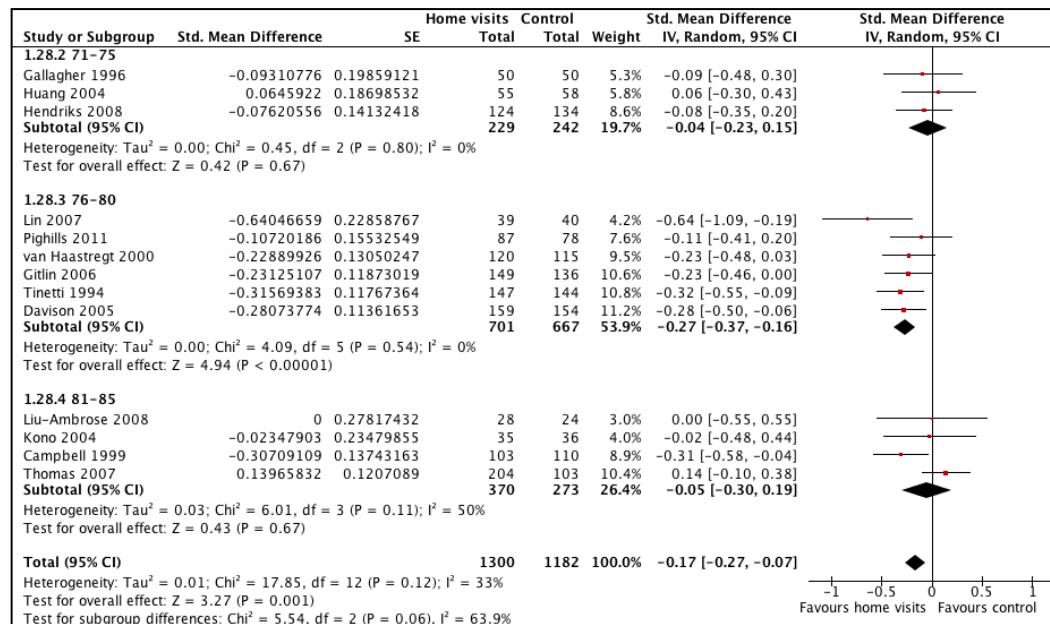

## Analysis 28: Falls (subjective); type of visitor subgroups

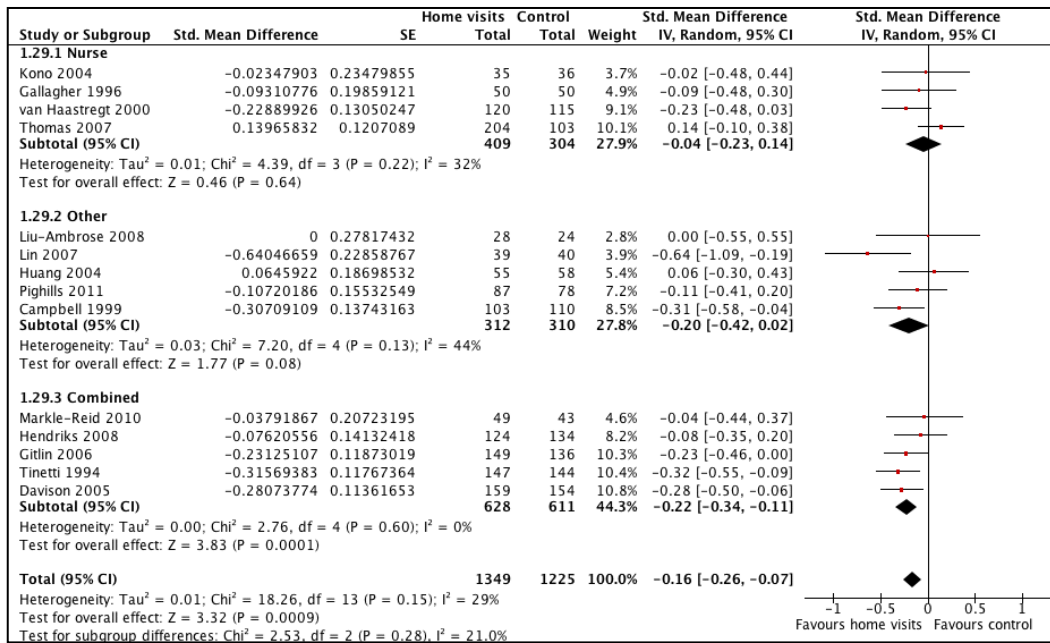

## Analysis 29: Falls (subjective); number of visits subgroups

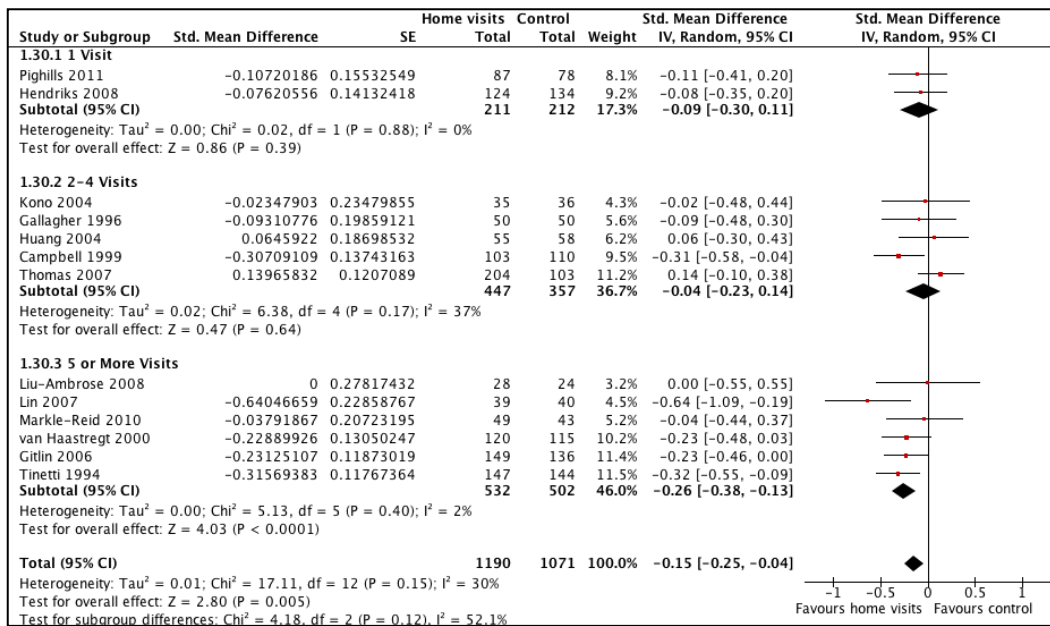



### Analysis 30: Functioning ADL/IADL at each follow-up interval

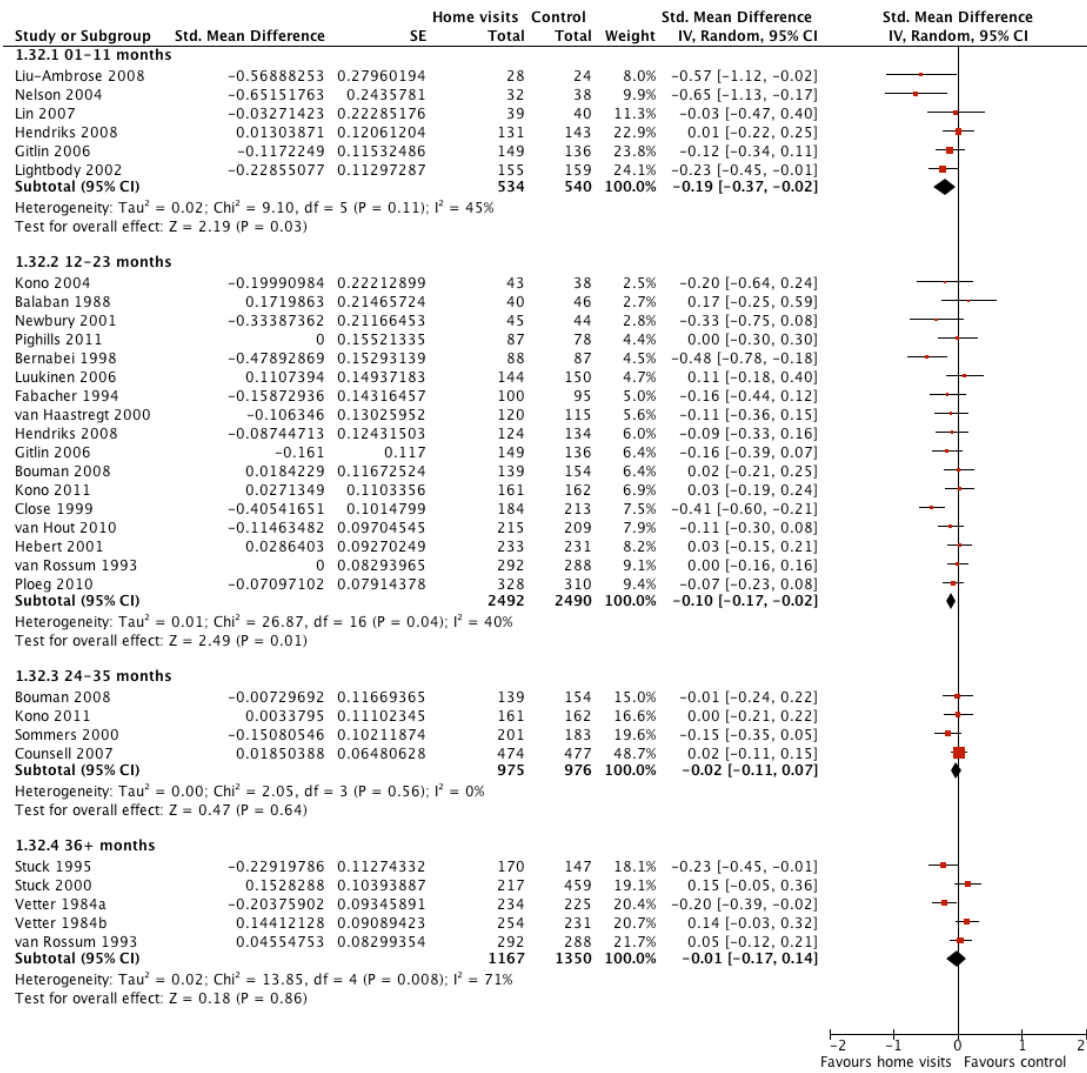

### Analysis 31: Functioning ADL/IADL; focus of visit subgroups

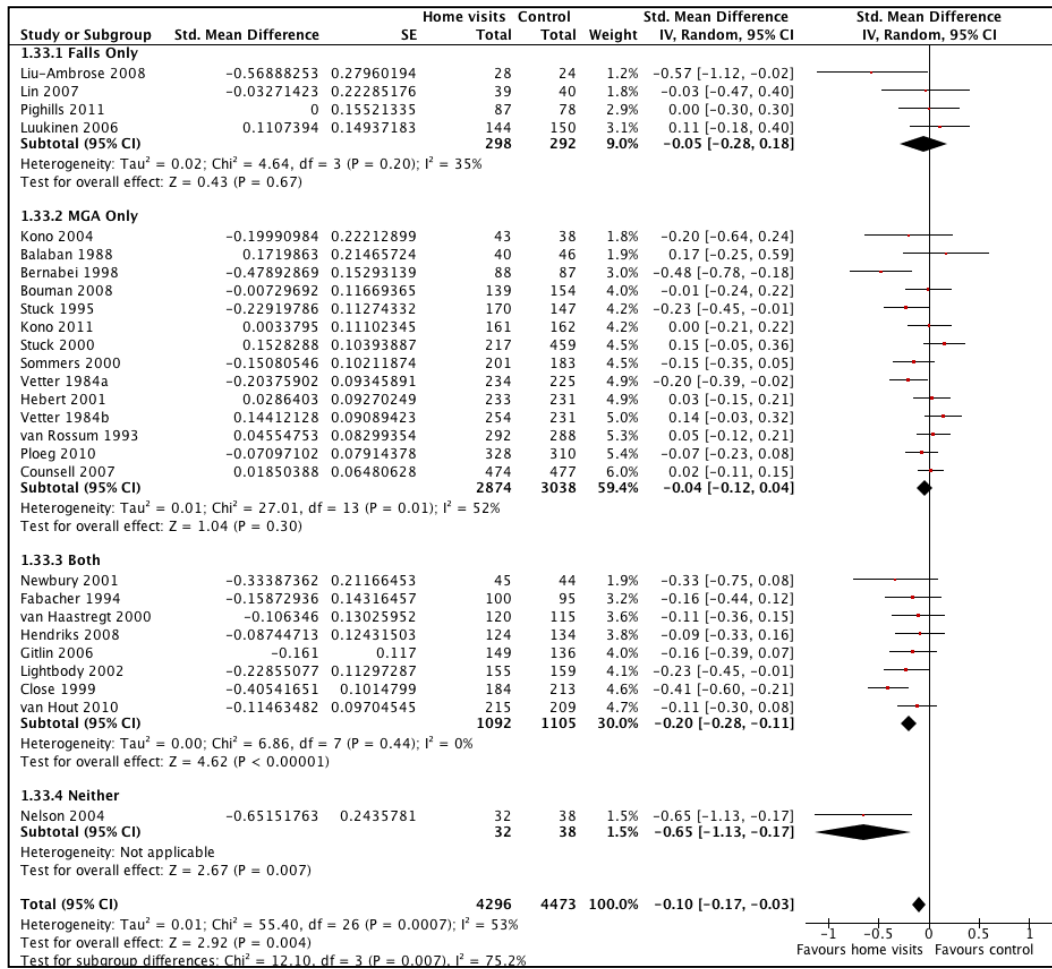

### Analysis 32: Functioning ADL/IADL; age of participants subgroups

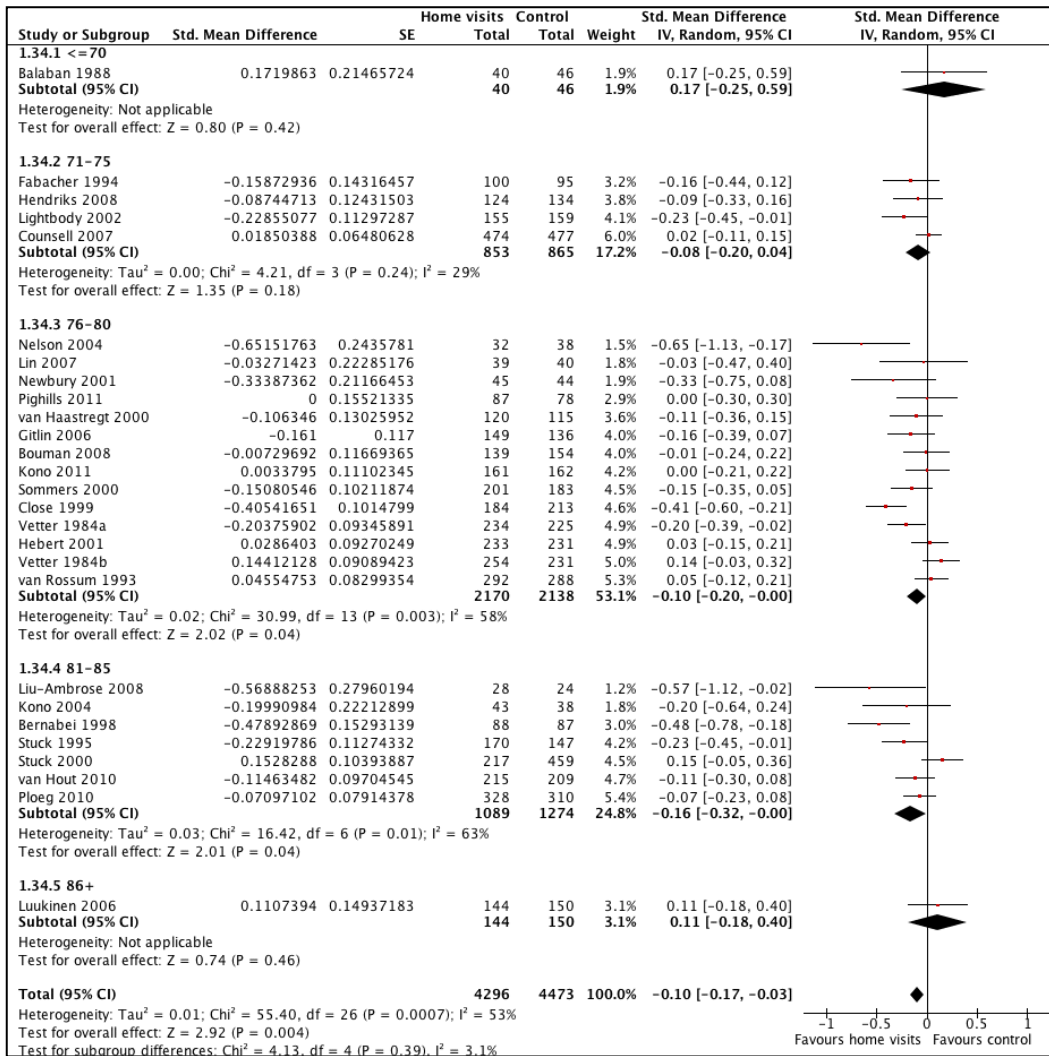

## Analysis 33: Functioning ADL/IADL; type of visitor subgroups

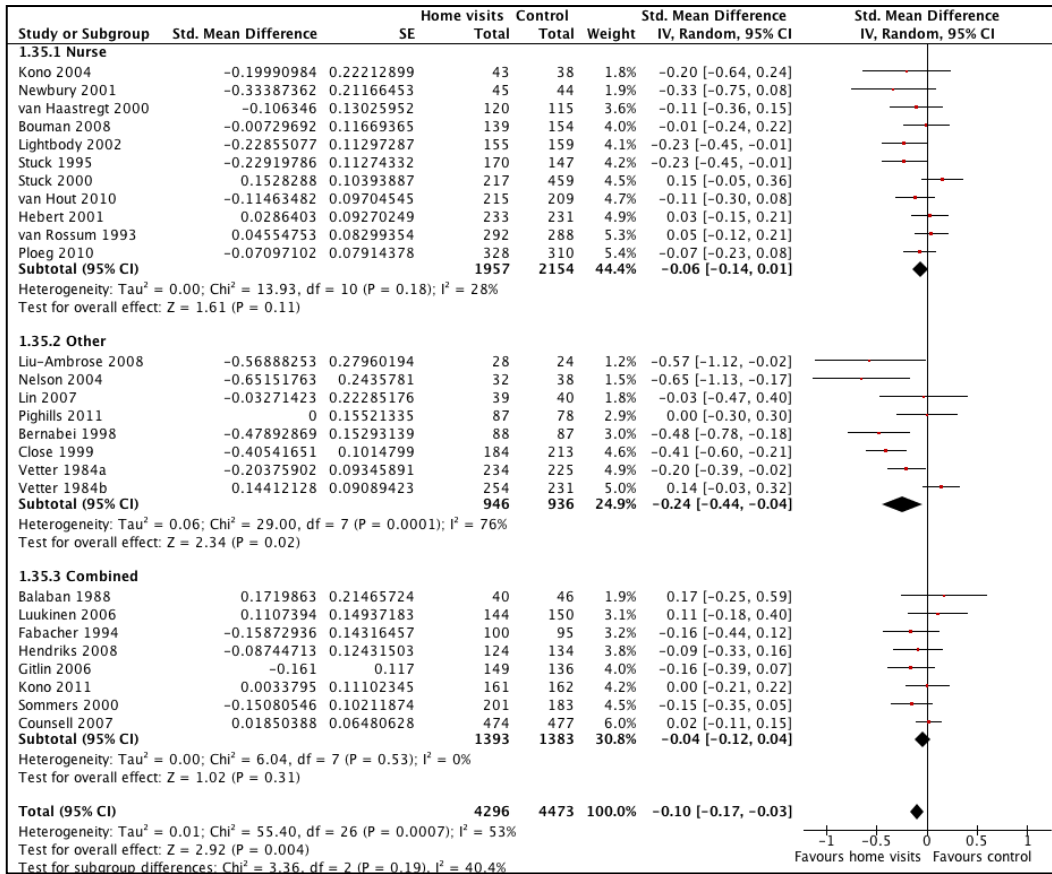

## Analysis 34: Functioning ADL/IADL; number of visits subgroups

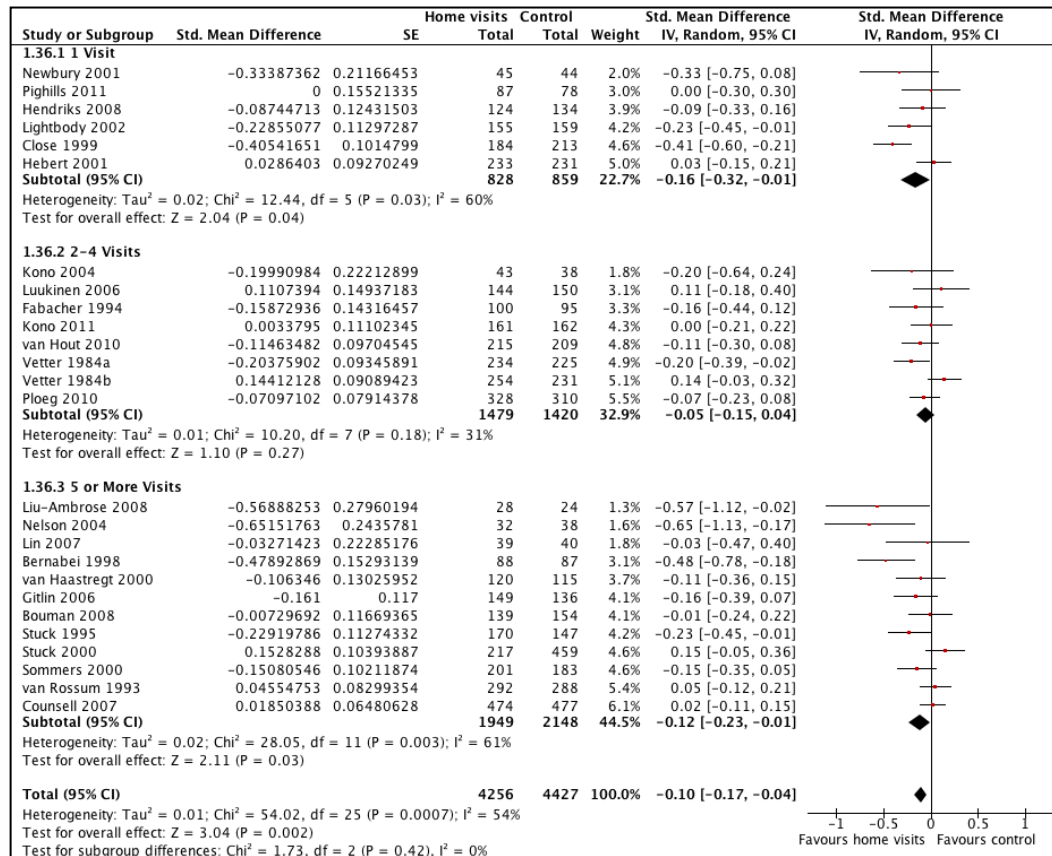

### Analysis 35: Cognitive functioning, results at longest follow-up

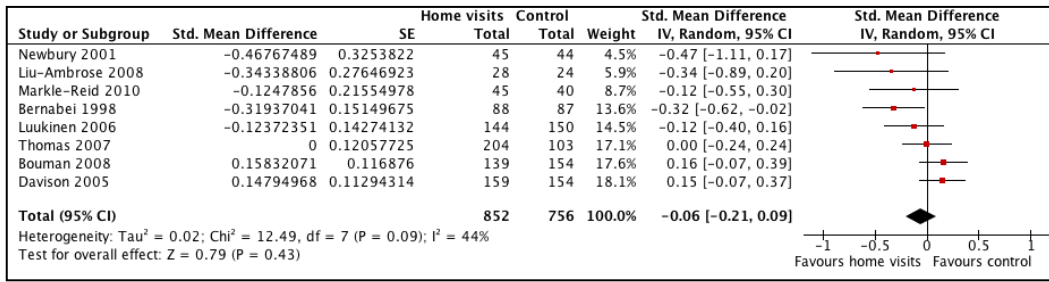

### Analysis 36: Quality of life at each follow-up interval

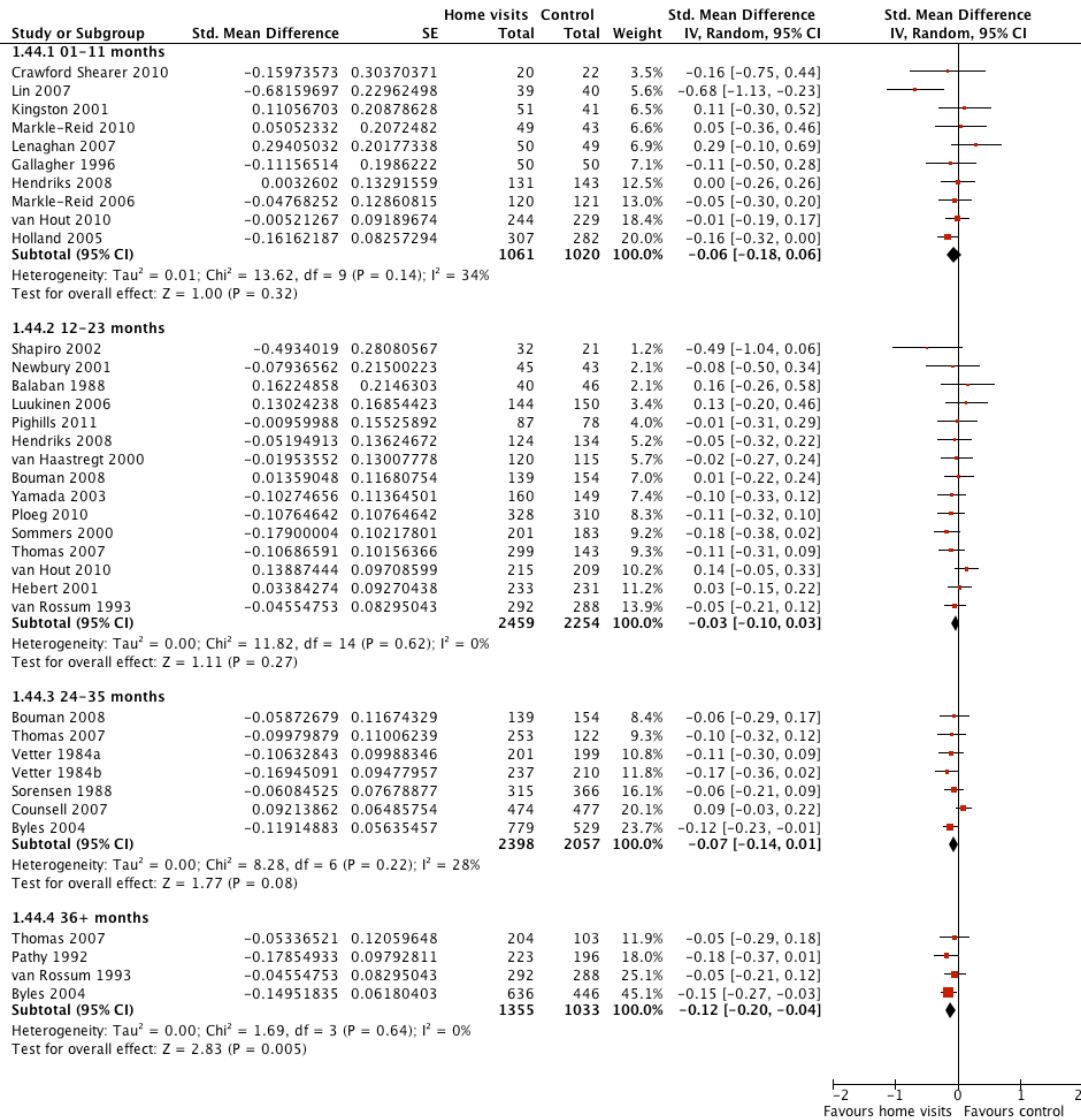

### Analysis 37: Quality of life; focus of visit subgroups

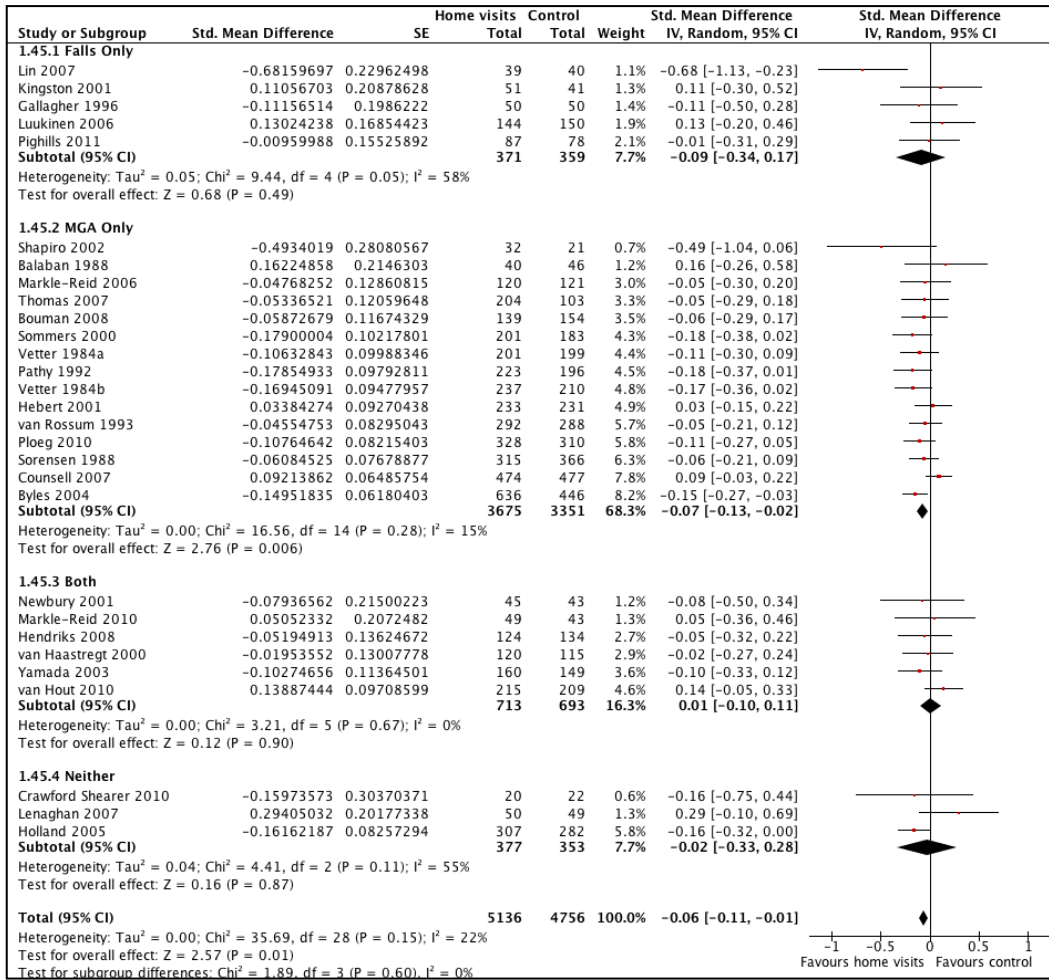

### Analysis 38: Quality of life; age of participants subgroups

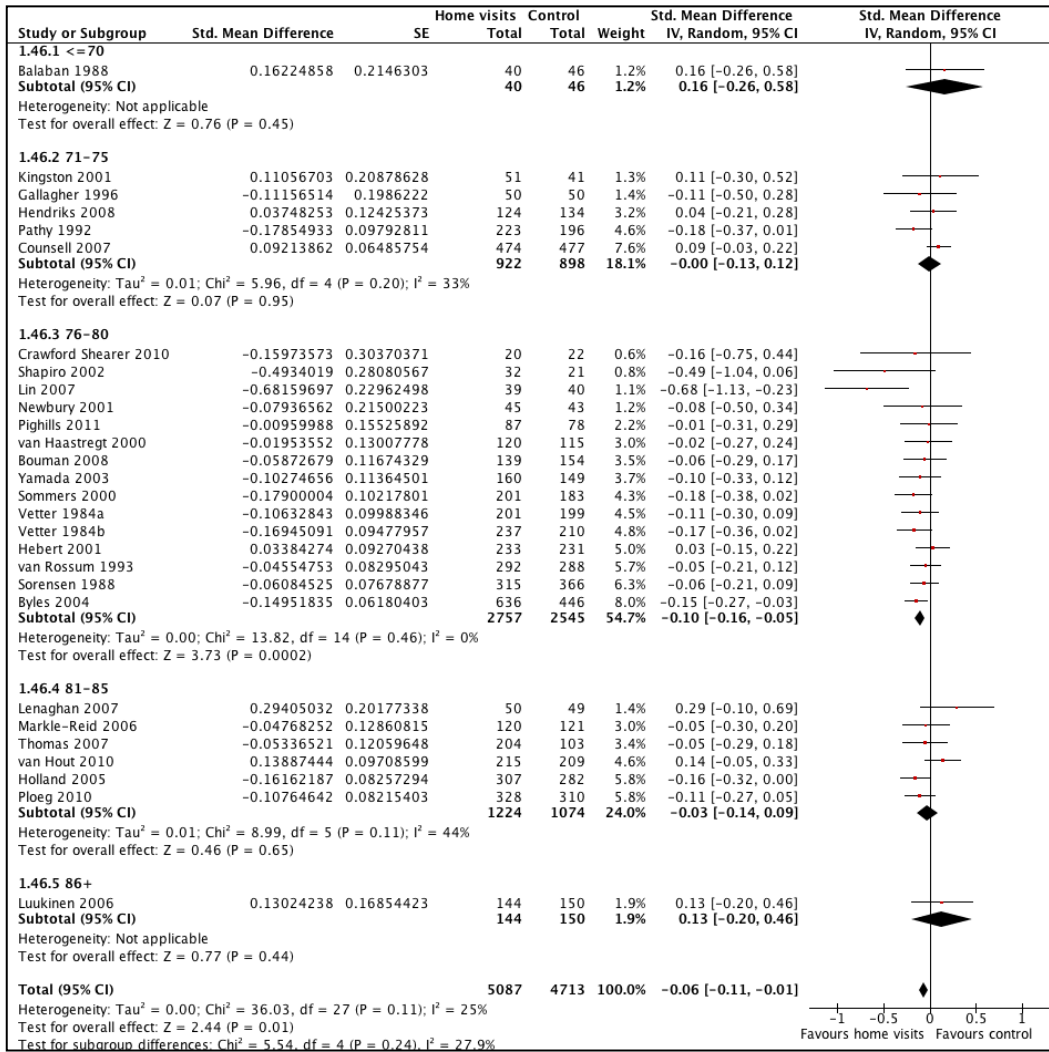





### Analysis 41: Hospitalisation admissions, results at longest follow-up

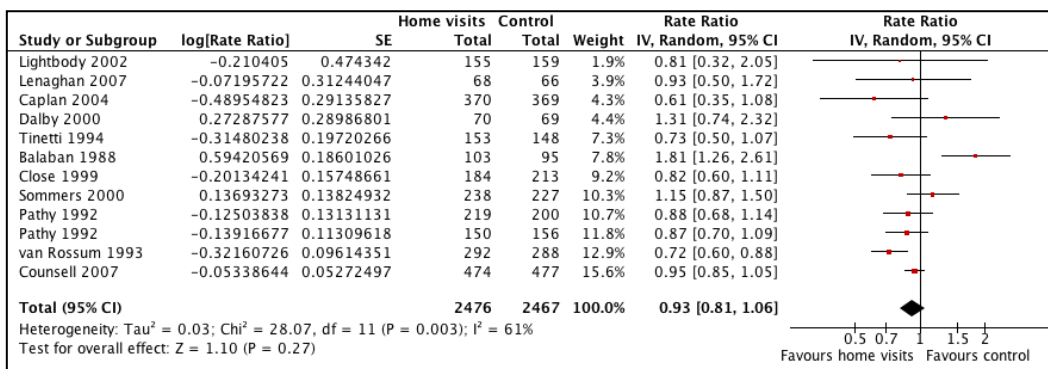

### Analysis 42: Hospitalisation admissions at each follow-up interval

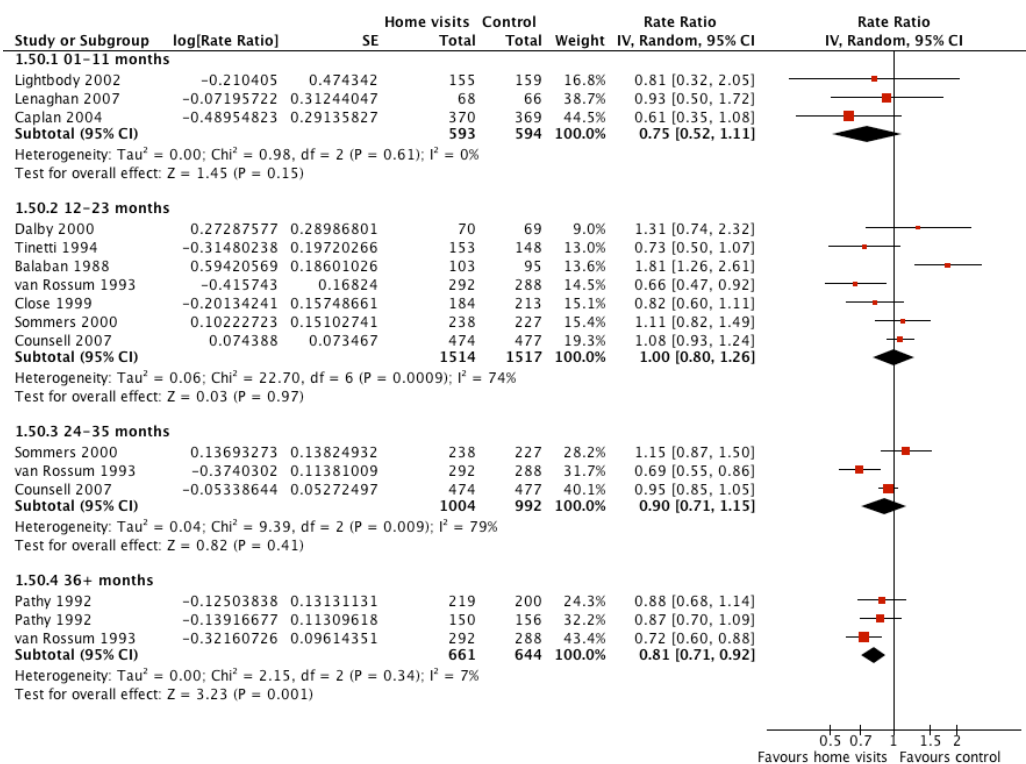

### Analysis 43: Hospitalisation admissions; focus of visit subgroups

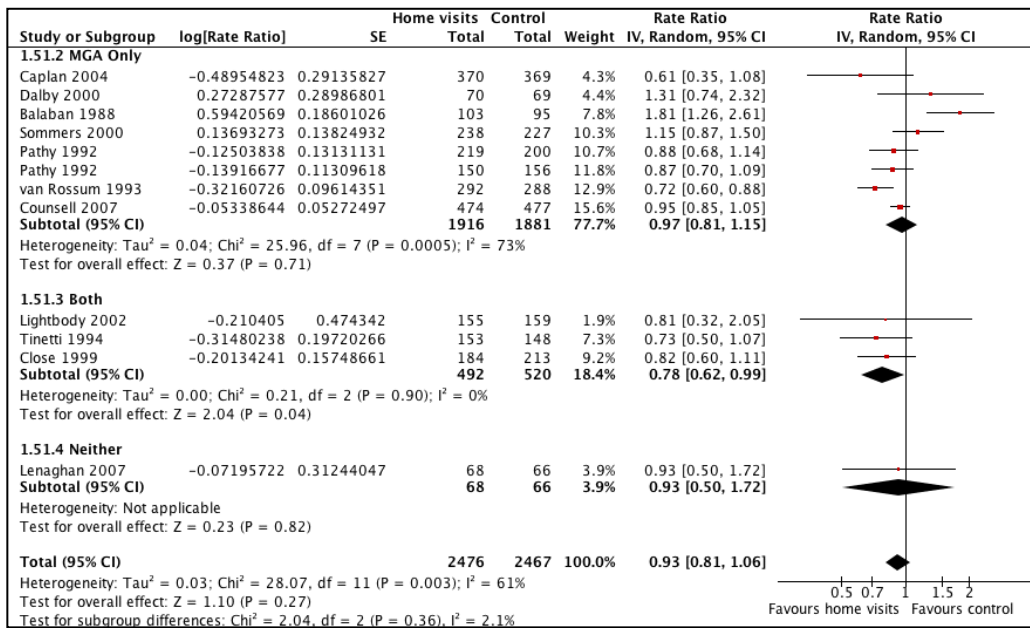

### Analysis 44: Hospitalisation admissions; age of participants subgroups

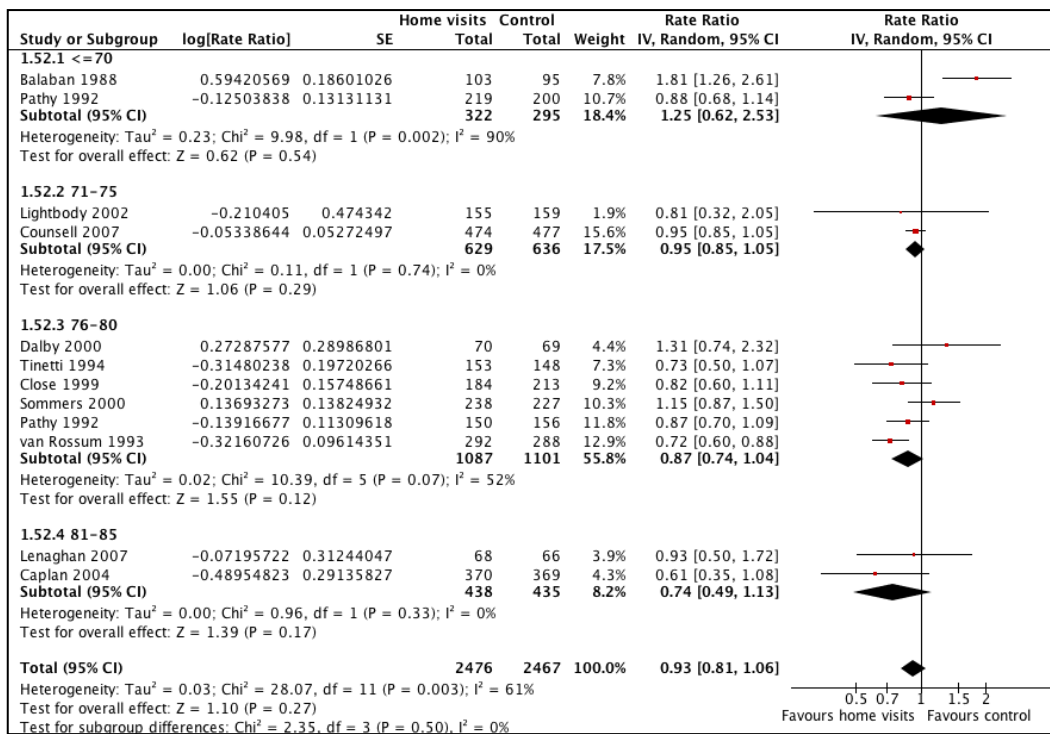

### Analysis 45: Hospitalisation admissions; type of visitor subgroups

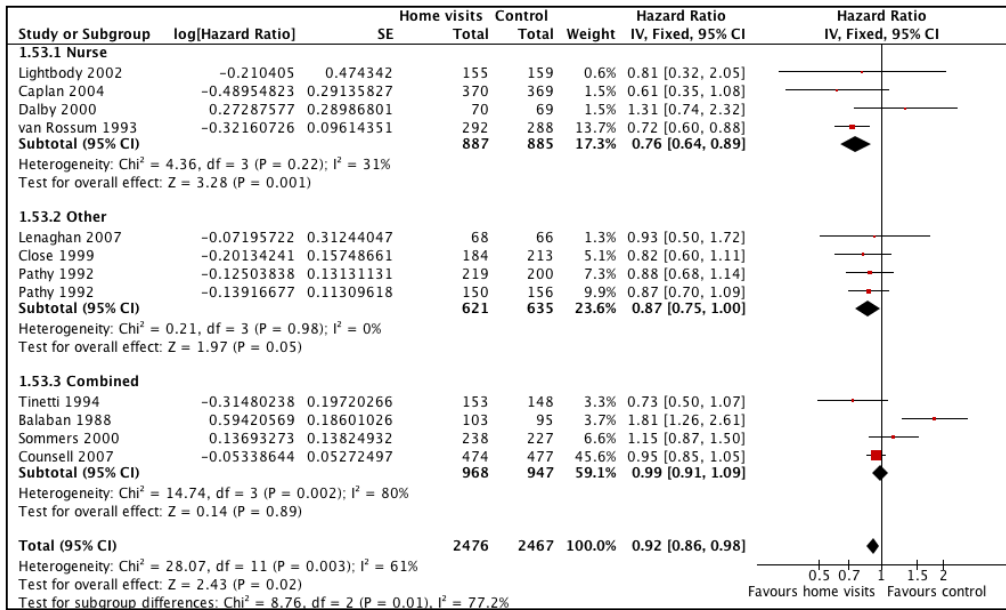

### Analysis 46: Hospitalisation admissions; number of visits subgroups

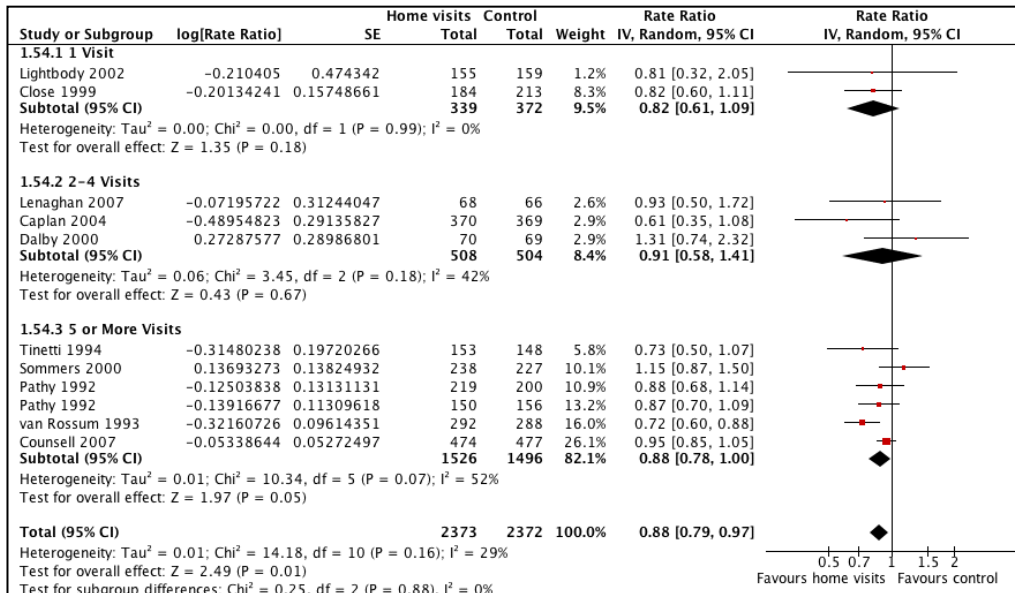

### Analysis 47: Hospitalisation (days), results at longest follow-up

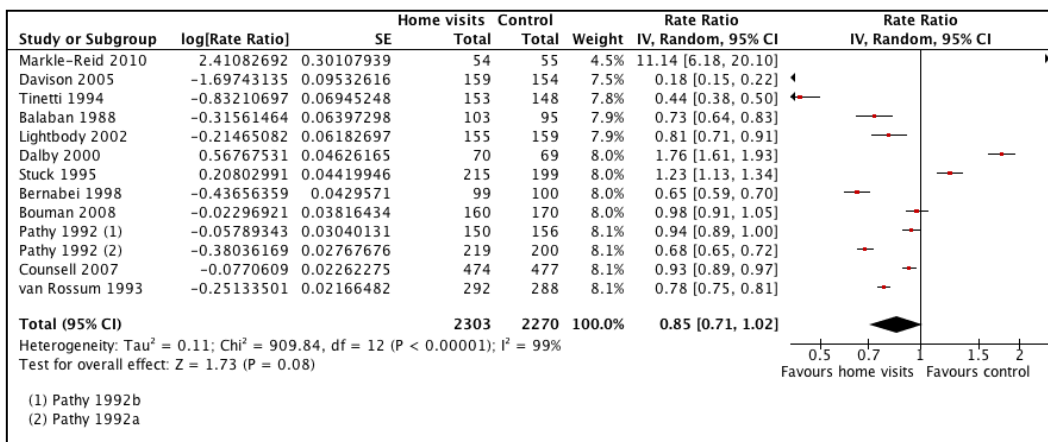

(1) Pathy 1992b  
(2) Pathy 1992a

### Analysis 48: Hospitalisation (days) at each follow-up interval

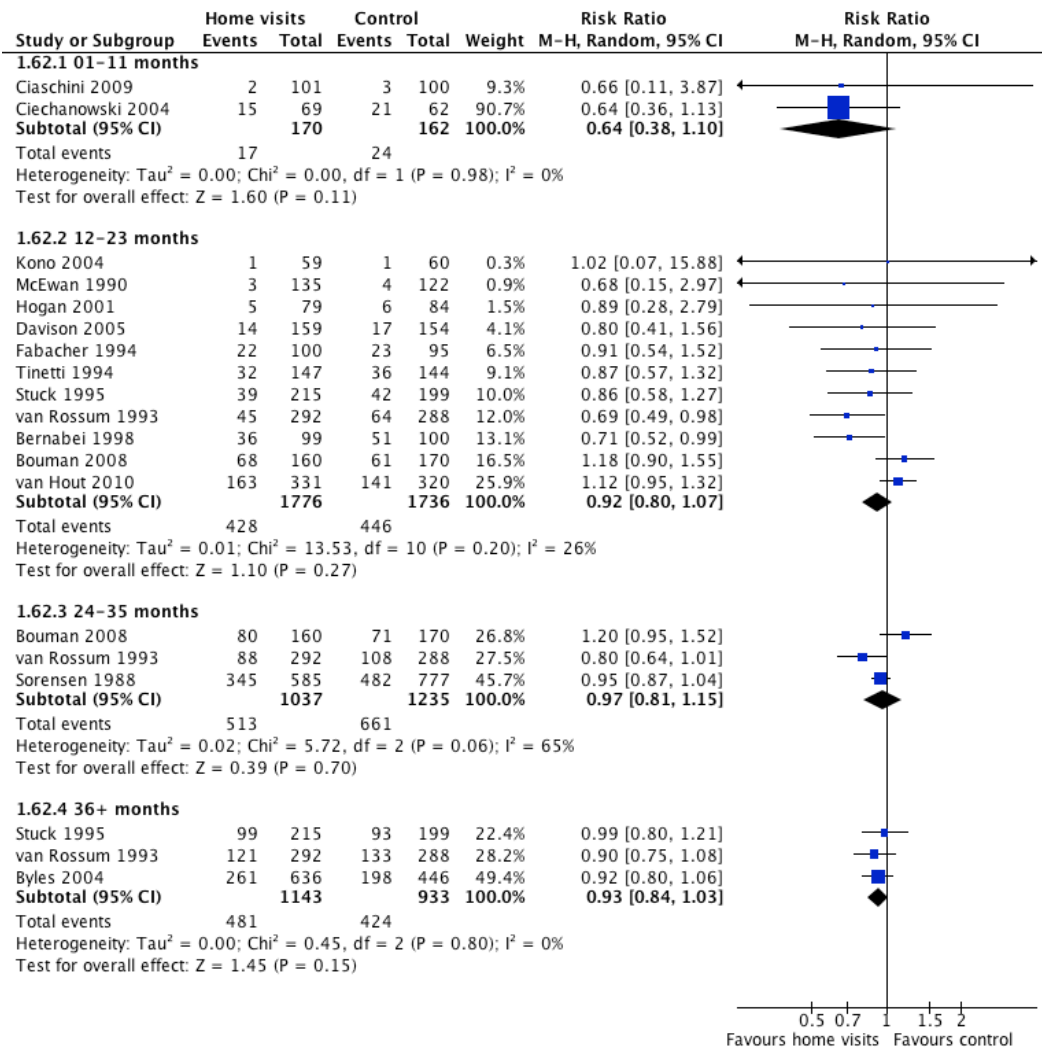

### Analysis 49: Hospitalisation (days); focus of visit subgroups

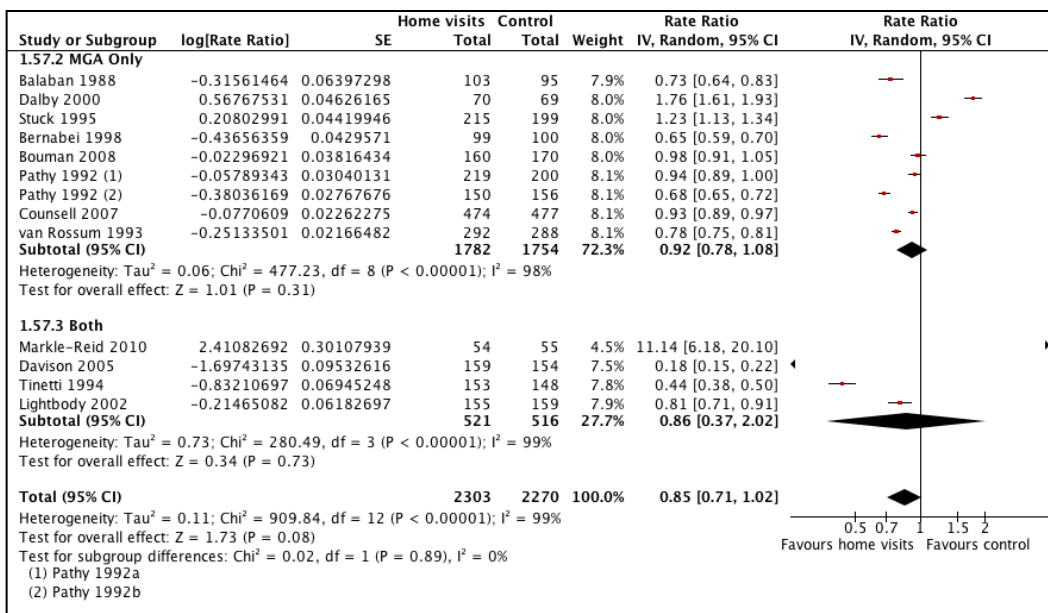

## Analysis 50: Hospitalisation (days); age of participants subgroups

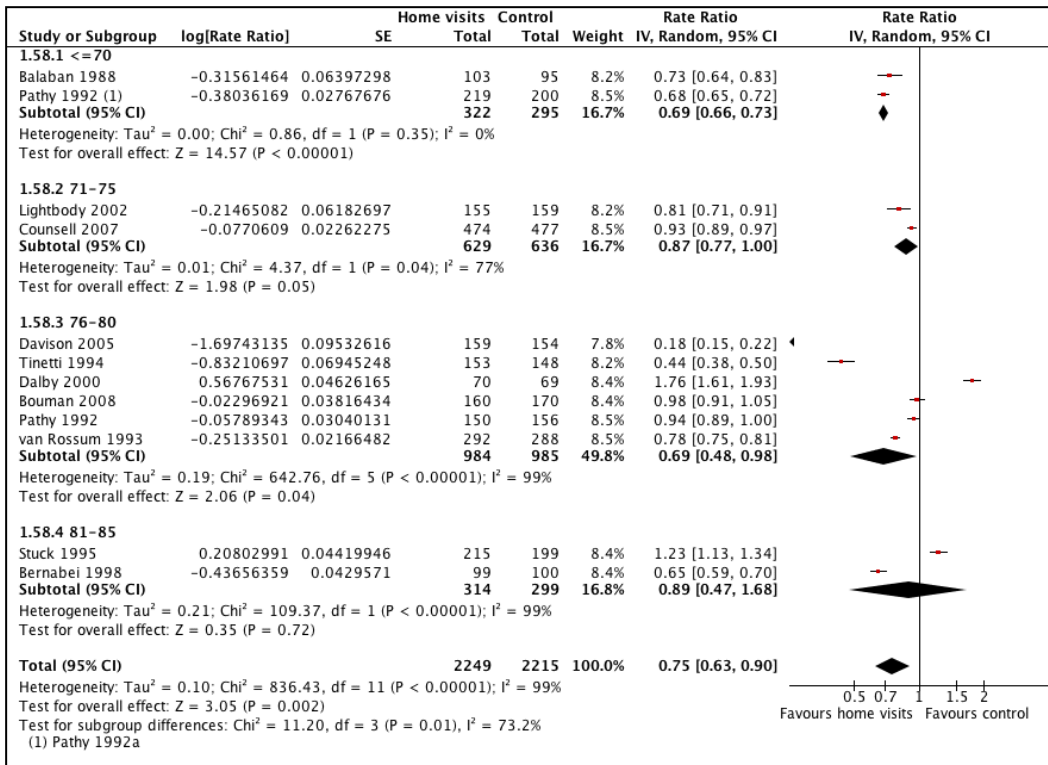

## Analysis 51: Hospitalisation (days); type of visitor subgroups

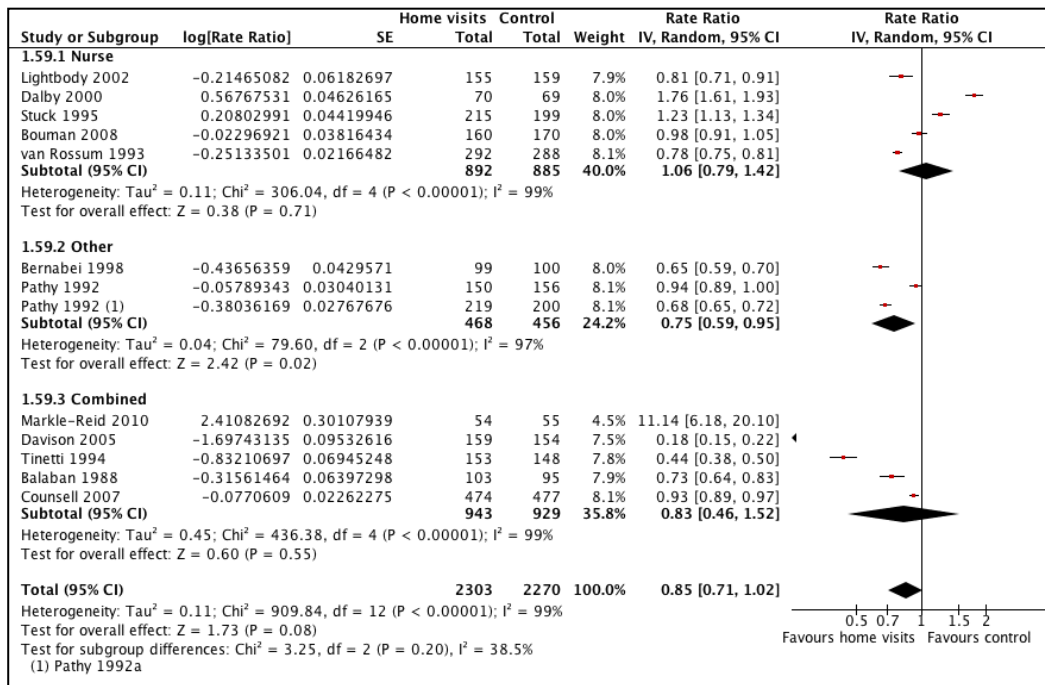

## Analysis 52: Hospitalisation (days); number of visits subgroups

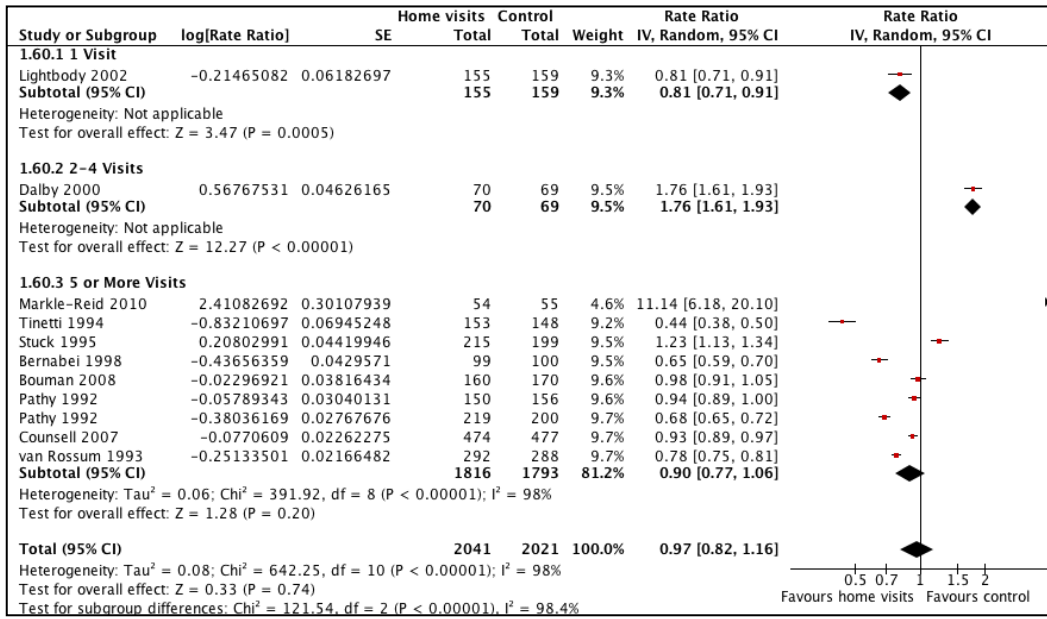

### Analysis 53: Hospitalisation (people) at each follow-up interval

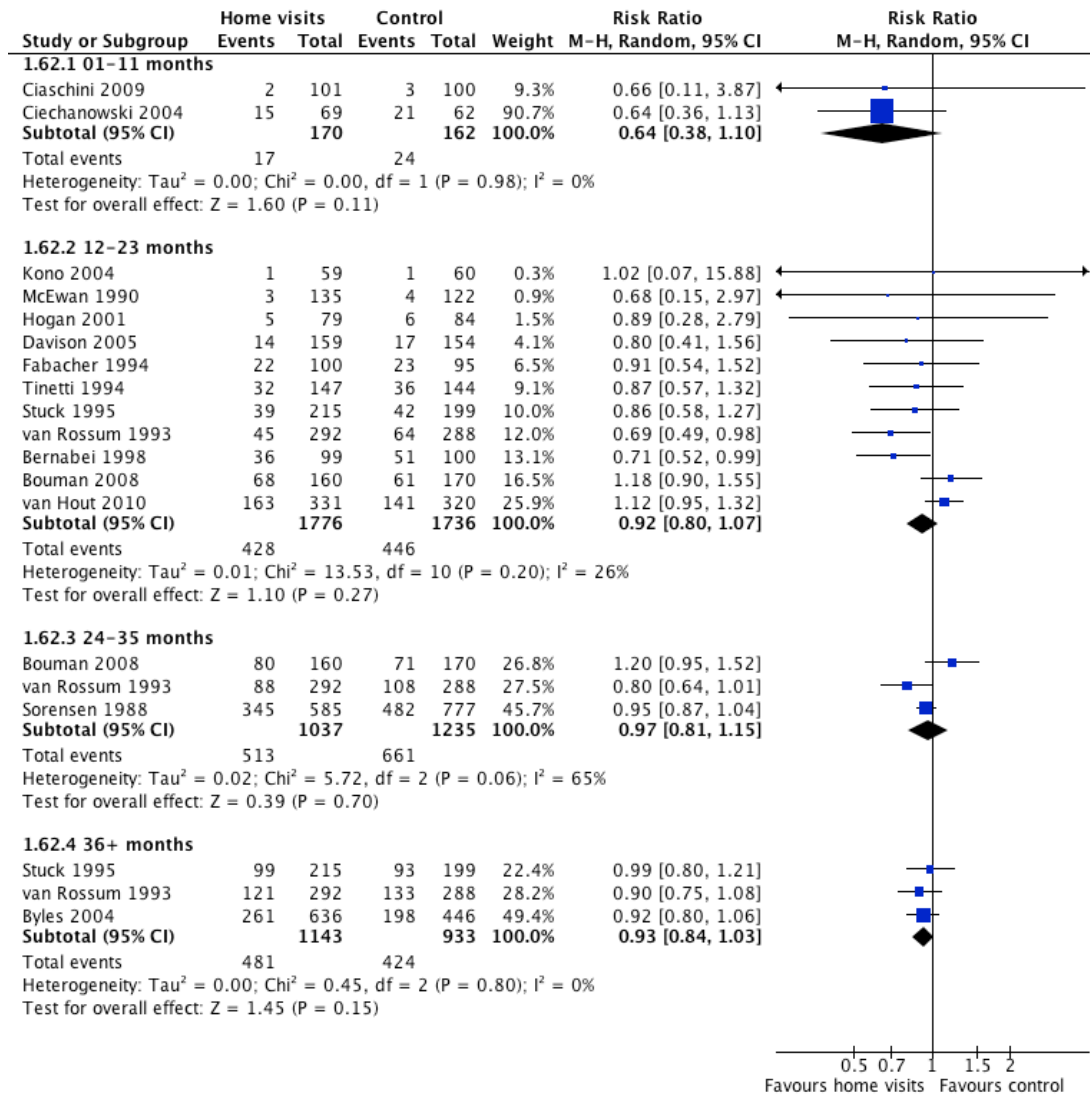

### Analysis 54: Hospitalisation (people); focus of visit subgroups

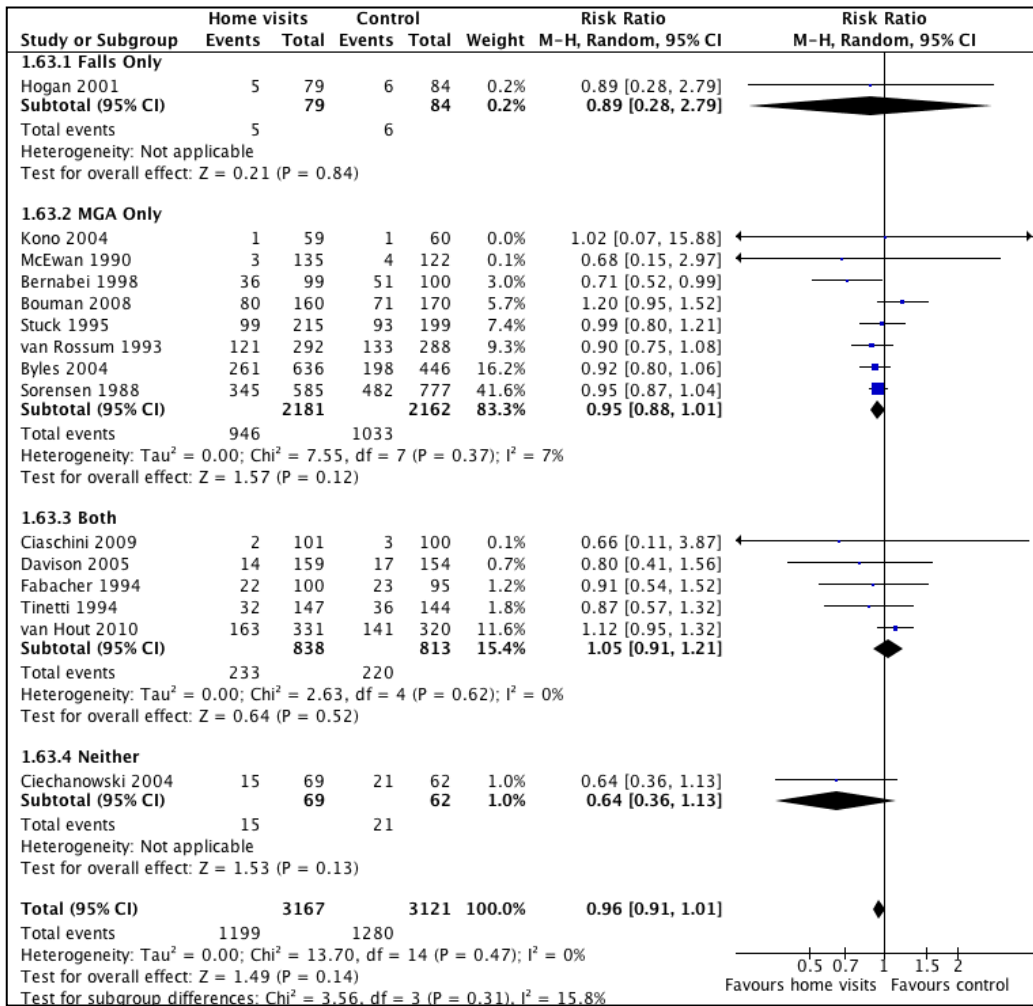



### Analysis 55: Hospitalisation (people); age of participants subgroups

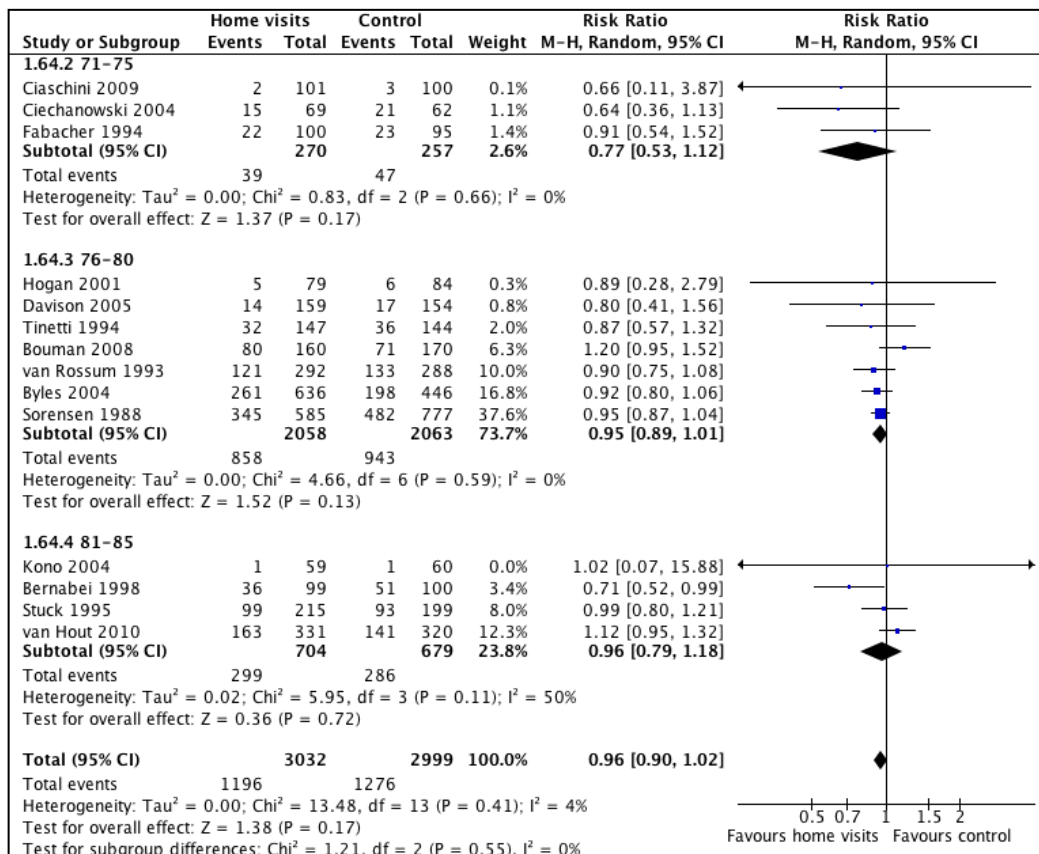

### Analysis 56: Hospitalisation (people); type of visitor subgroups

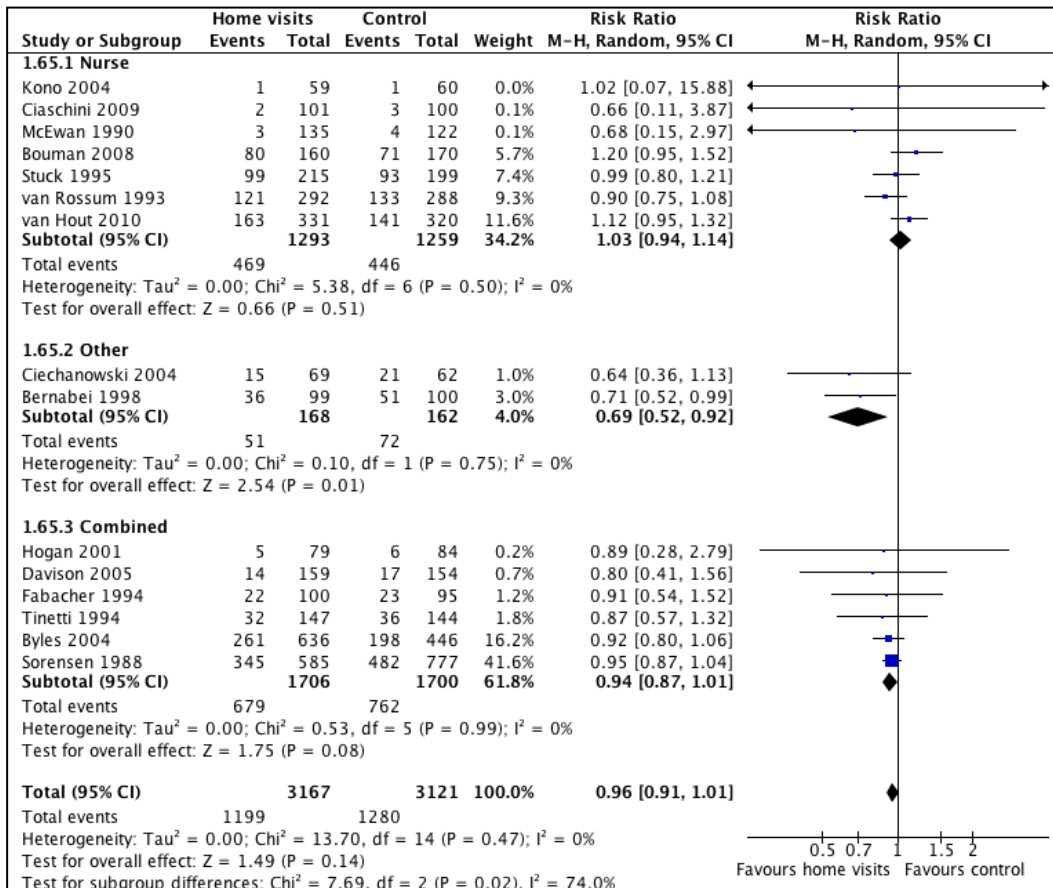

### Analysis 57: Hospitalisation (people); number of visits subgroups

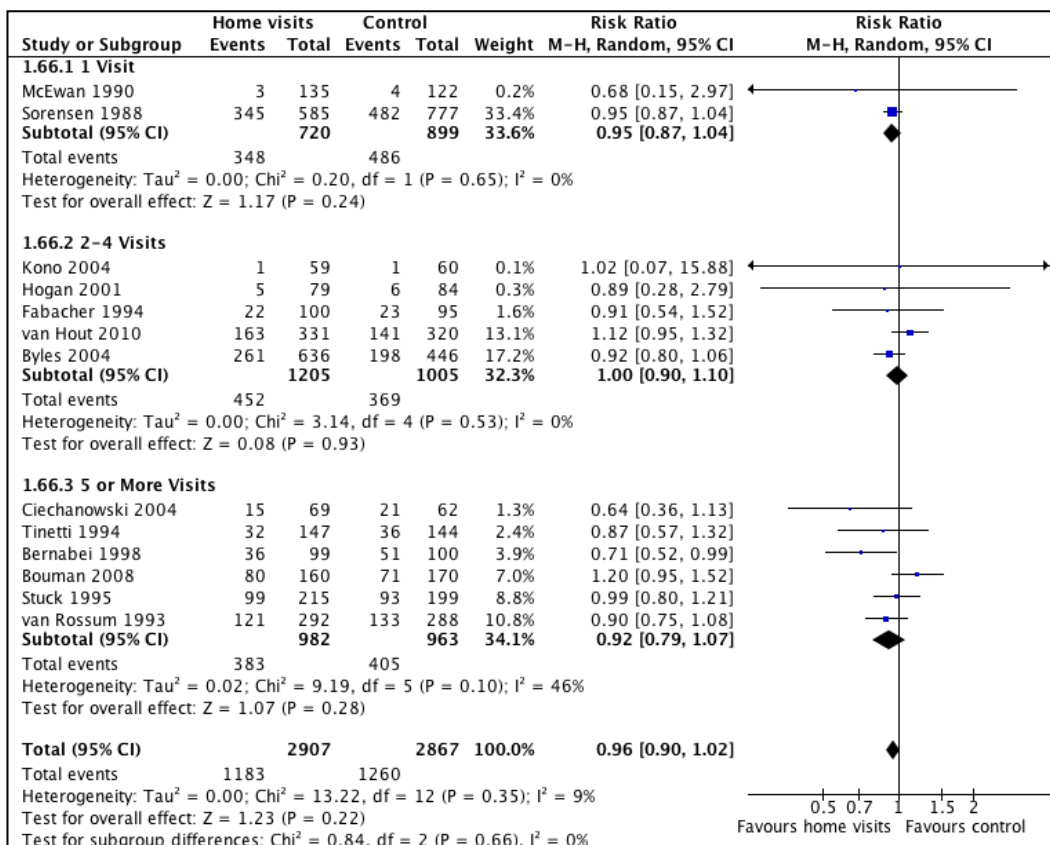

### Analysis 58: Injuries (number), results at longest follow-up

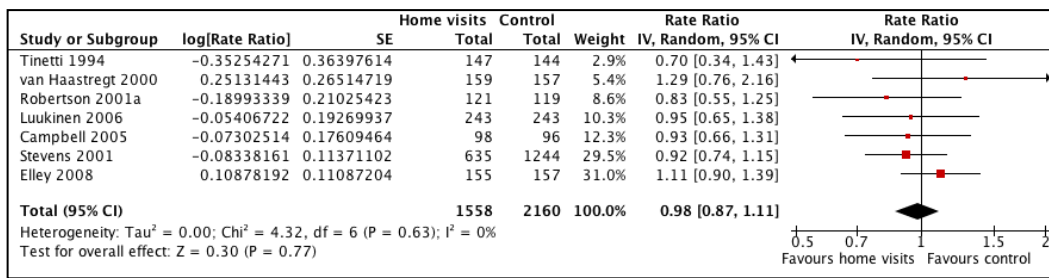

### Analysis 59: Injuries (people), results at longest follow-up

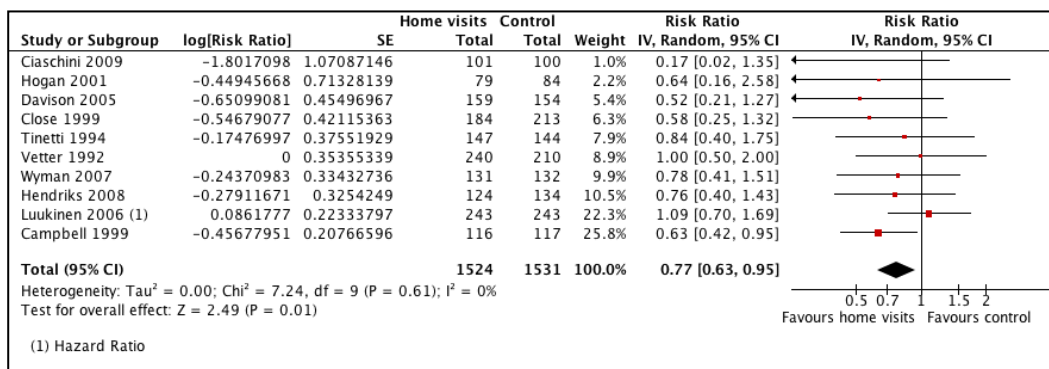

### Analysis 60: Injuries (people) at each follow-up interval

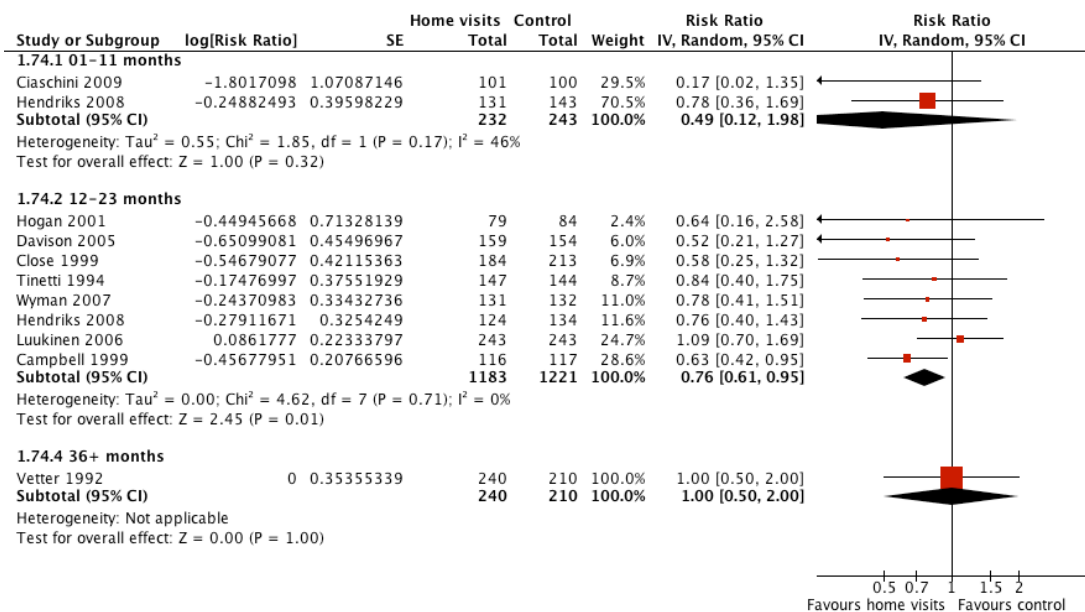

## Analysis 61: Injuries (people); focus of visit subgroups

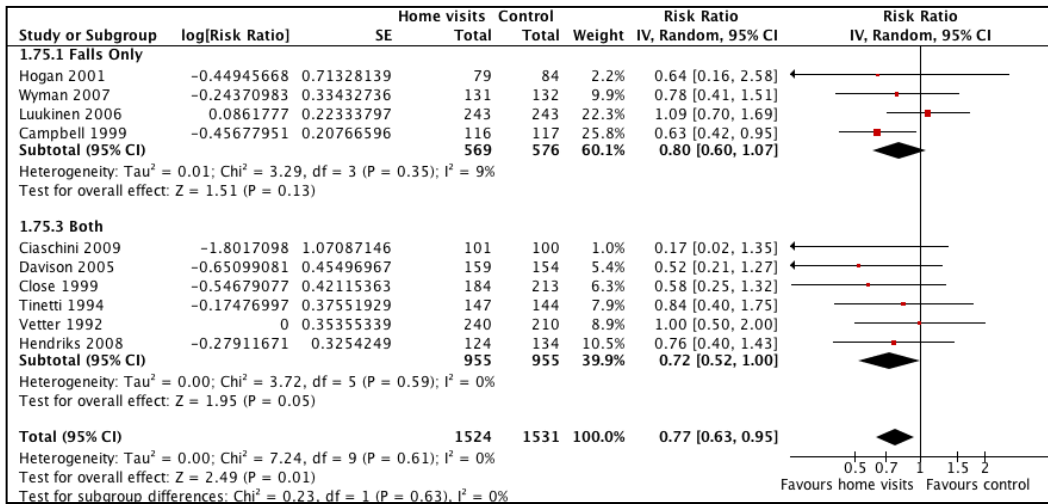

## Analysis 62: Injuries (people); age of participants subgroups

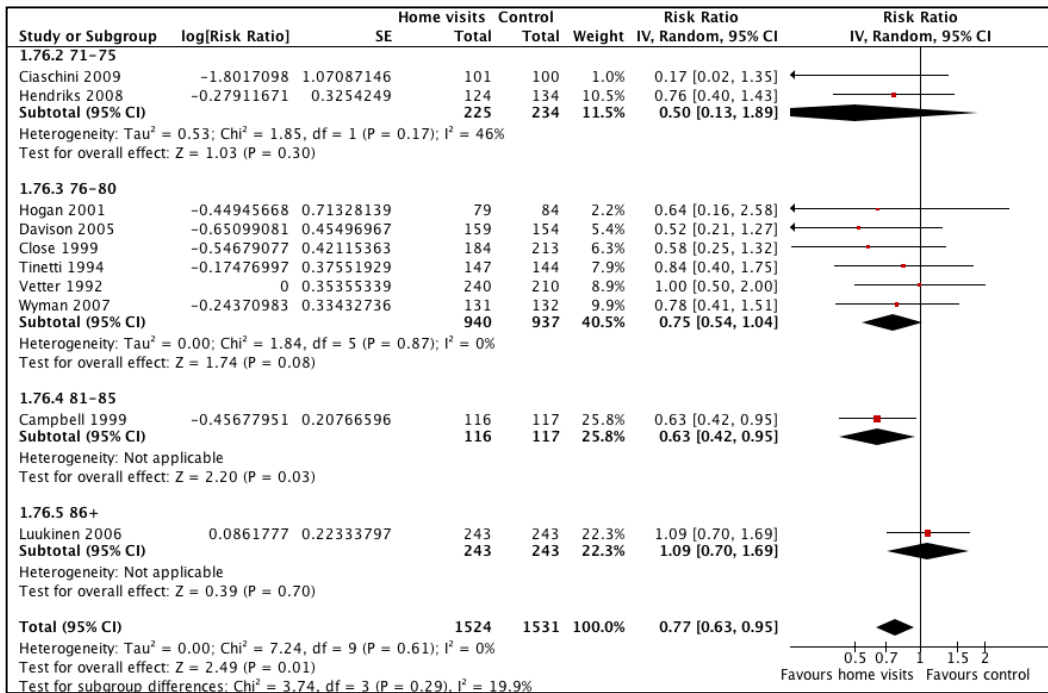

### Analysis 63: Injuries (people); type of visitor subgroups

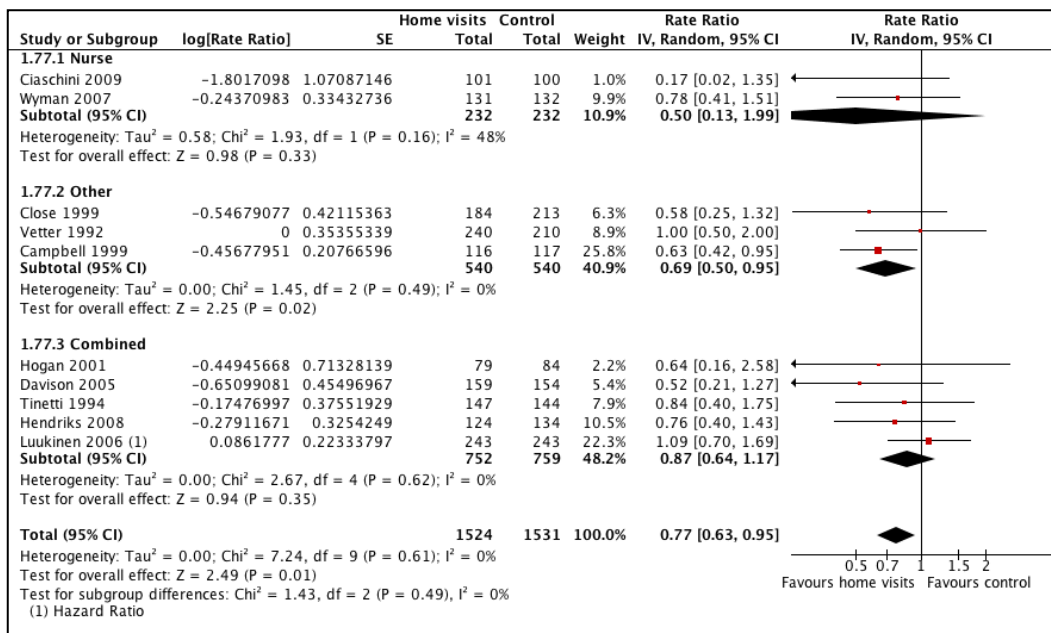

### Analysis 64: Injuries (people); number of visits subgroups

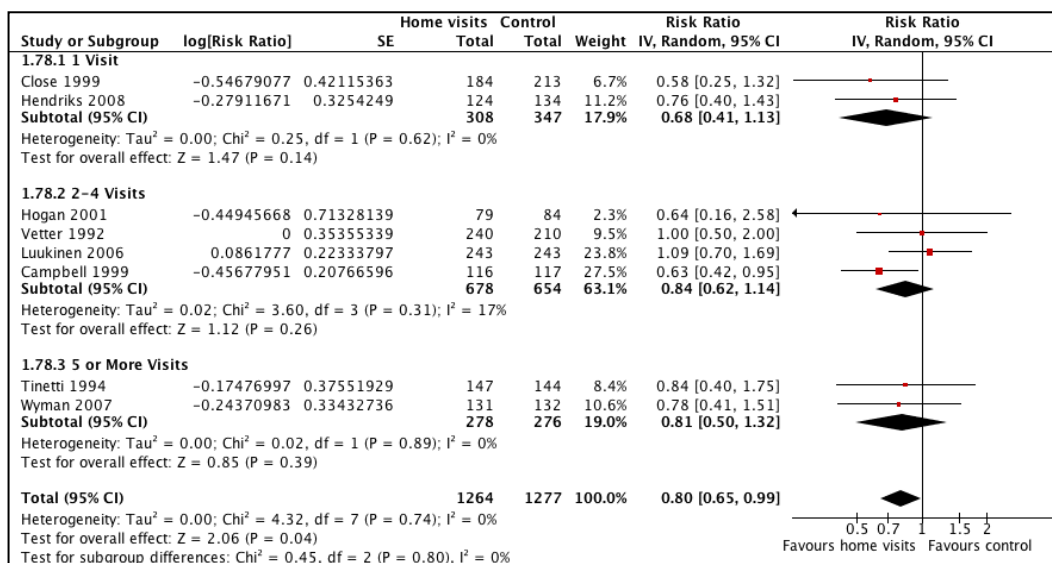

### Analysis 65: Institutionalisation (days), results at longest follow-up

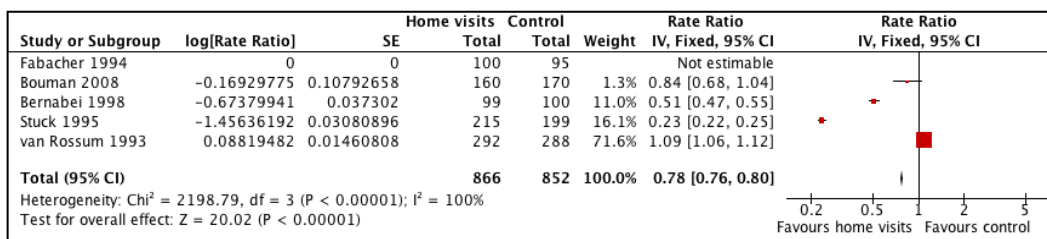

## Analysis 66: Institutionalisation (people) at each follow-up interval

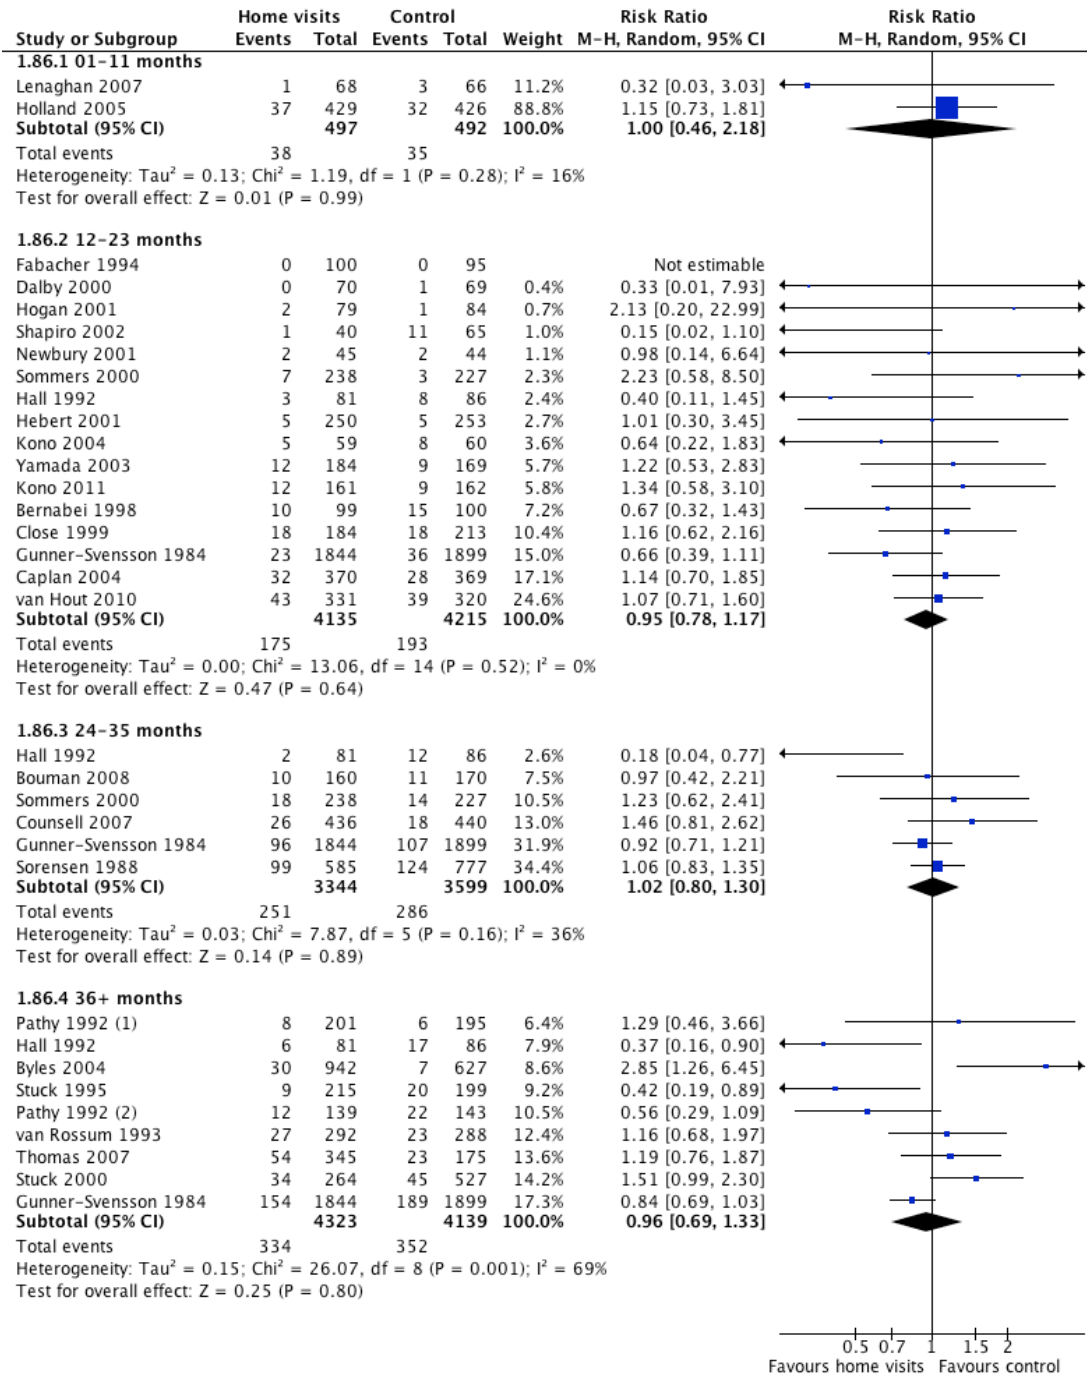

### Analysis 67: Institutionalisation (people); focus of visit subgroups

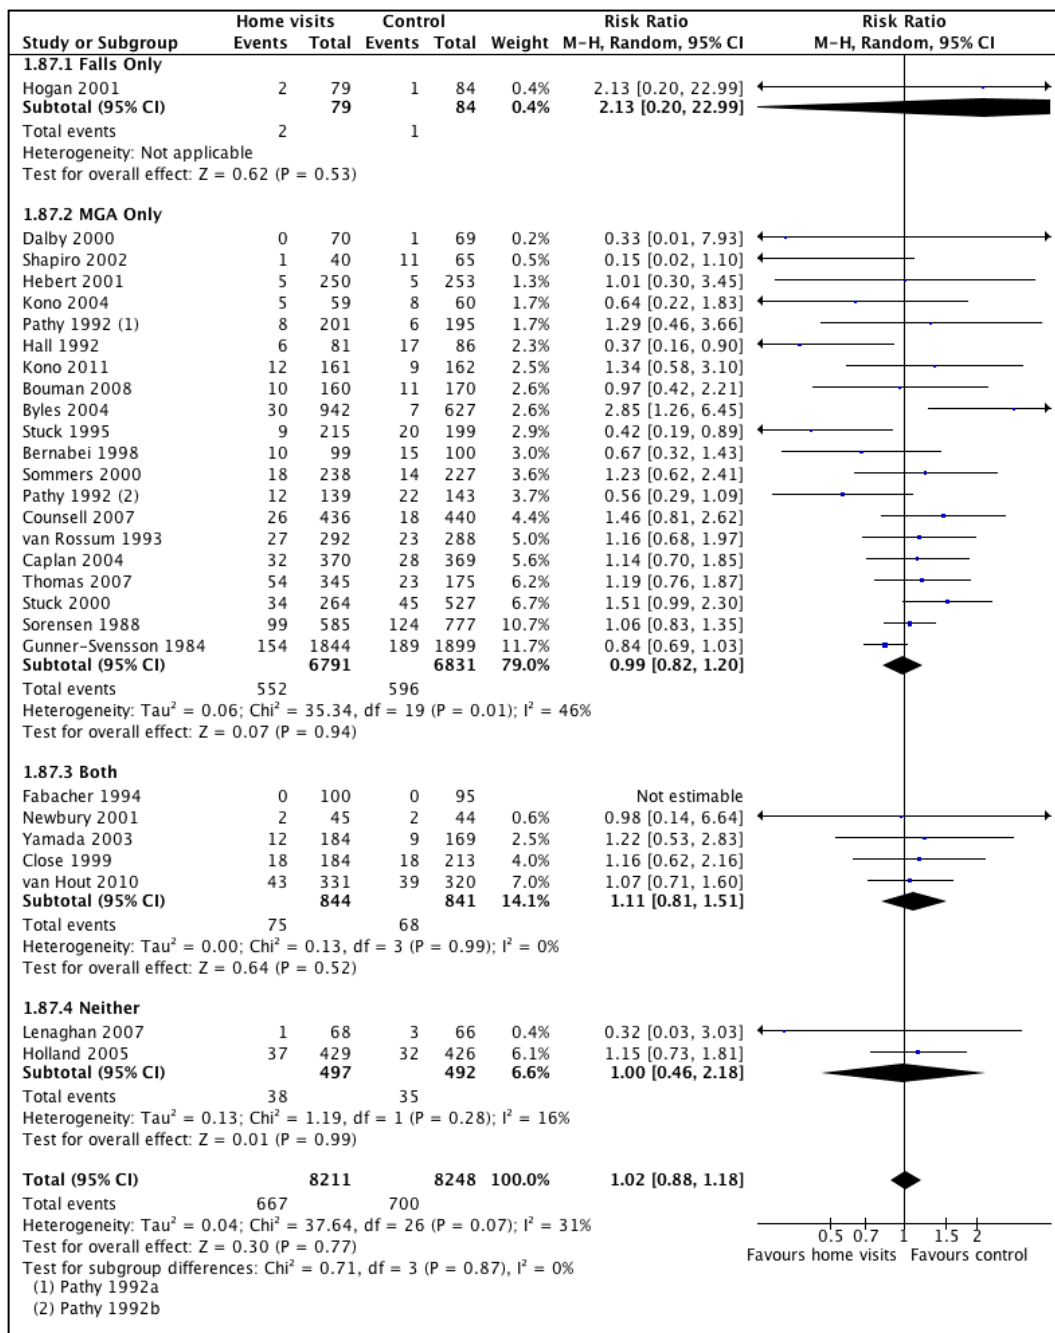

### Analysis 68: Institutionalisation (people); age of participants subgroups

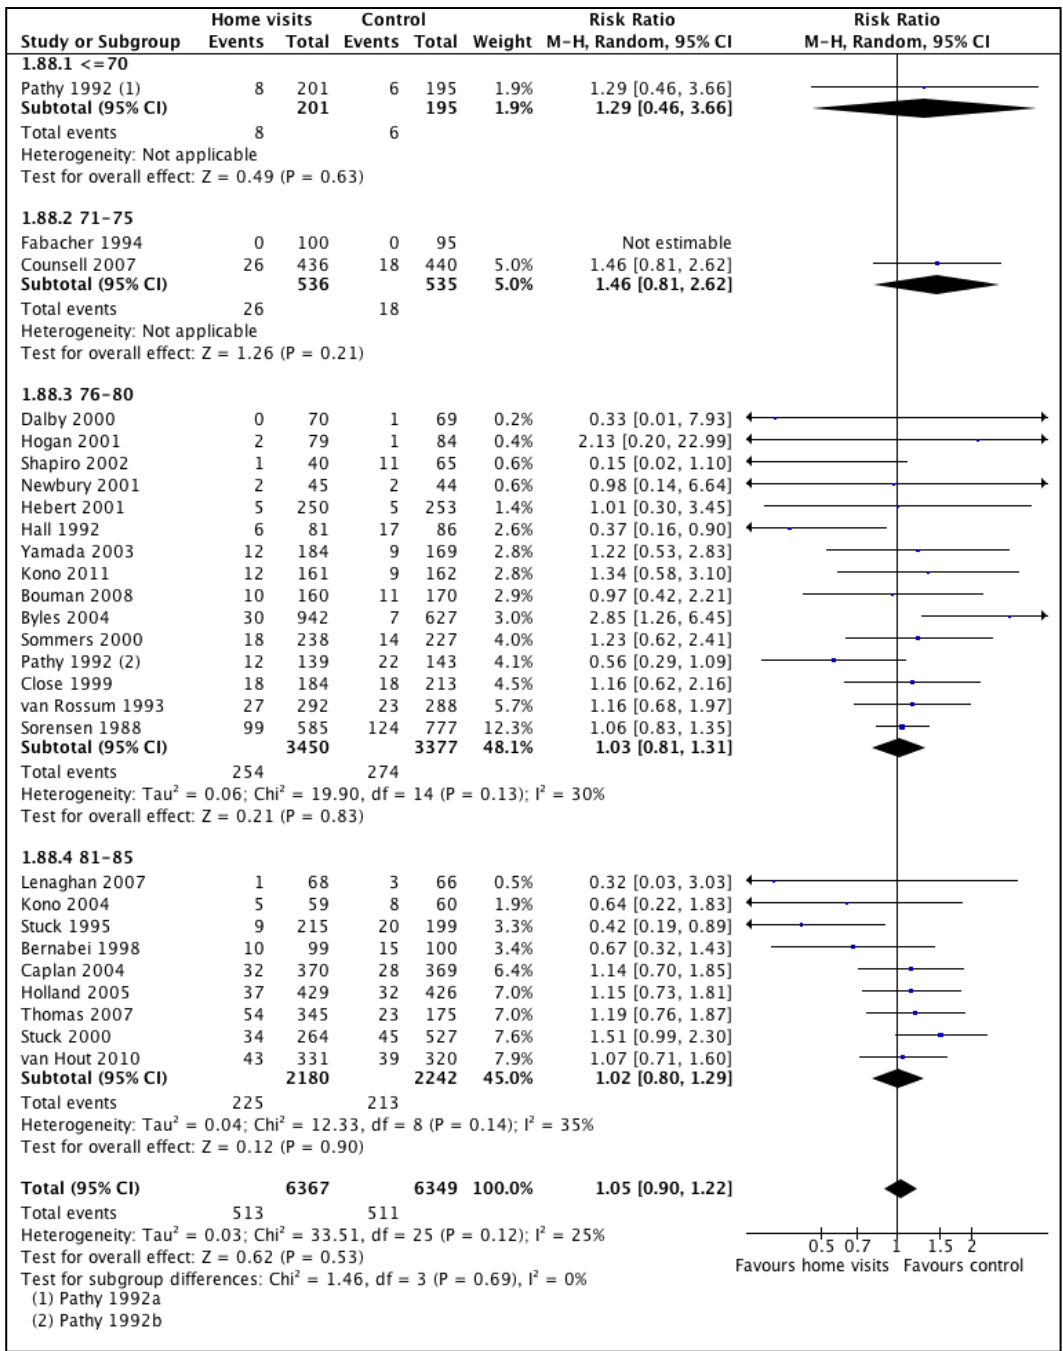



### Analysis 69: Institutionalisation (people); type of visitor subgroups

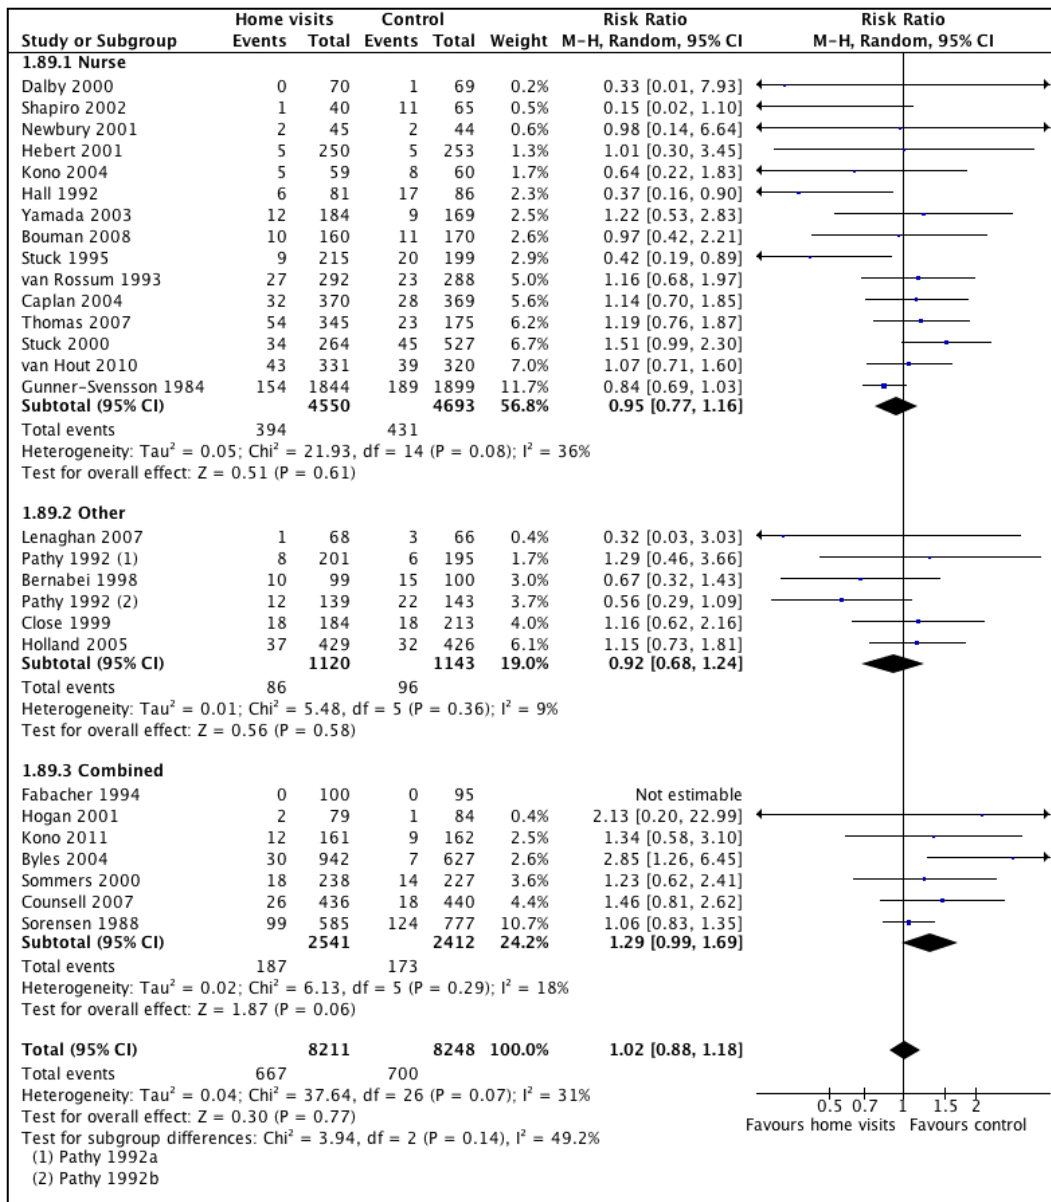

### Analysis 70: Institutionalisation (people); number of visits subgroups

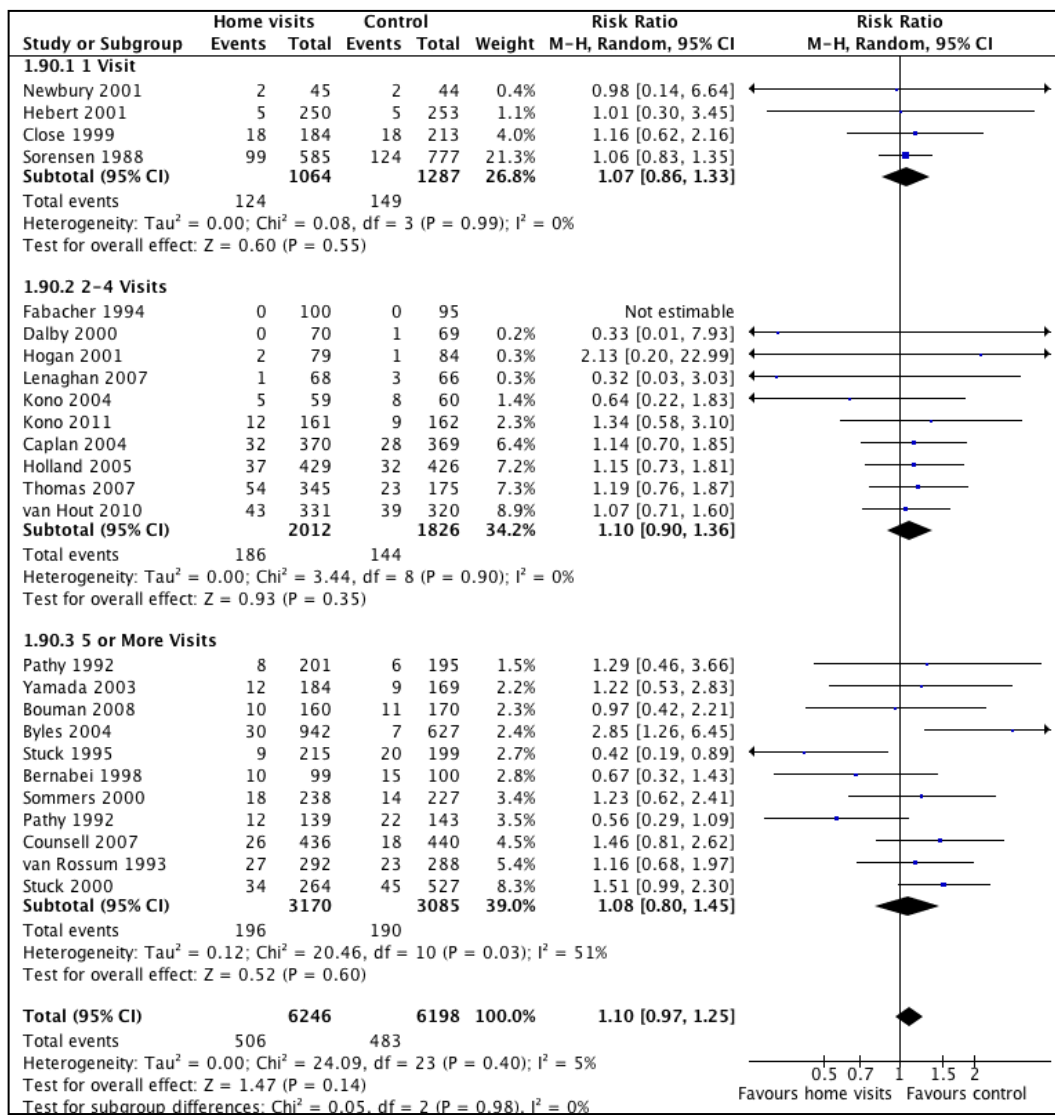

# Analysis 71: Mortality (Focus of visits subgroups)

| Study or Subgroup                                                                                       | Home visits |              | Control |              | Weight        | Risk Ratio          |                     | Risk Ratio |  |
|---------------------------------------------------------------------------------------------------------|-------------|--------------|---------|--------------|---------------|---------------------|---------------------|------------|--|
|                                                                                                         | Events      | Total        | Events  | Total        |               | M-H, Random, 95% CI | M-H, Random, 95% CI |            |  |
| <b>2.90.1 Falls Only</b>                                                                                |             |              |         |              |               |                     |                     |            |  |
| Wyman 2007                                                                                              | 0           | 137          | 0       | 135          |               | Not estimable       |                     |            |  |
| Gallagher 1996                                                                                          | 0           | 50           | 0       | 50           |               | Not estimable       |                     |            |  |
| Lin 2007                                                                                                | 1           | 50           | 0       | 50           | 0.0%          | 3.00                | [0.13, 71.92]       |            |  |
| Gustafsson 2012                                                                                         | 2           | 174          | 0       | 114          | 0.1%          | 3.29                | [0.16, 67.82]       |            |  |
| Liu-Ambrose 2008                                                                                        | 1           | 36           | 2       | 38           | 0.1%          | 0.53                | [0.05, 5.57]        |            |  |
| Robertson 2001a                                                                                         | 1           | 121          | 6       | 119          | 0.1%          | 0.16                | [0.02, 1.34]        |            |  |
| Hogan 2001                                                                                              | 2           | 79           | 5       | 84           | 0.2%          | 0.43                | [0.08, 2.13]        |            |  |
| Green 2002                                                                                              | 4           | 85           | 5       | 85           | 0.3%          | 0.80                | [0.22, 2.88]        |            |  |
| Elley 2008                                                                                              | 7           | 155          | 4       | 157          | 0.3%          | 1.77                | [0.53, 5.93]        |            |  |
| Campbell 1999                                                                                           | 4           | 116          | 7       | 117          | 0.3%          | 0.58                | [0.17, 1.92]        |            |  |
| Campbell 2005                                                                                           | 4           | 98           | 7       | 96           | 0.3%          | 0.56                | [0.17, 1.85]        |            |  |
| Luukinen 2006                                                                                           | 48          | 243          | 50      | 243          | 3.5%          | 0.96                | [0.67, 1.37]        |            |  |
| <b>Subtotal (95% CI)</b>                                                                                |             | <b>1344</b>  |         | <b>1288</b>  | <b>5.2%</b>   | <b>0.88</b>         | <b>[0.66, 1.18]</b> |            |  |
| Total events: Home visits 74, Control 86                                                                |             |              |         |              |               |                     |                     |            |  |
| Heterogeneity: $\tau^2 = 0.00$ ; $\text{Chi}^2 = 7.32$ , $\text{df} = 9$ ( $P = 0.60$ ); $I^2 = 0\%$    |             |              |         |              |               |                     |                     |            |  |
| Test for overall effect: $Z = 0.84$ ( $P = 0.40$ )                                                      |             |              |         |              |               |                     |                     |            |  |
| <b>2.90.2 MGA Only</b>                                                                                  |             |              |         |              |               |                     |                     |            |  |
| Shapiro 2002                                                                                            | 1           | 40           | 4       | 65           | 0.1%          | 0.41                | [0.05, 3.51]        |            |  |
| Dalby 2000                                                                                              | 7           | 70           | 3       | 69           | 0.3%          | 2.30                | [0.62, 8.53]        |            |  |
| Kono 2004                                                                                               | 4           | 59           | 6       | 60           | 0.3%          | 0.68                | [0.20, 2.28]        |            |  |
| Ploeg 2010                                                                                              | 10          | 361          | 10      | 358          | 0.6%          | 0.99                | [0.42, 2.35]        |            |  |
| Bernabei 1998                                                                                           | 12          | 100          | 13      | 100          | 0.8%          | 0.92                | [0.44, 1.92]        |            |  |
| Hebert 2001                                                                                             | 12          | 250          | 18      | 253          | 0.9%          | 0.67                | [0.33, 1.37]        |            |  |
| Kono 2011                                                                                               | 11          | 161          | 20      | 162          | 0.9%          | 0.55                | [0.27, 1.12]        |            |  |
| Hall 1992                                                                                               | 14          | 81           | 18      | 86           | 1.2%          | 0.83                | [0.44, 1.55]        |            |  |
| McEwan 1990                                                                                             | 16          | 151          | 23      | 145          | 1.3%          | 0.67                | [0.37, 1.21]        |            |  |
| Sommers 2000                                                                                            | 26          | 383          | 26      | 351          | 1.6%          | 0.92                | [0.54, 1.55]        |            |  |
| Stuck 1995                                                                                              | 24          | 215          | 26      | 199          | 1.7%          | 0.85                | [0.51, 1.44]        |            |  |
| Bouman 2008                                                                                             | 29          | 160          | 23      | 170          | 1.8%          | 1.34                | [0.81, 2.22]        |            |  |
| Balaban 1988                                                                                            | 31          | 103          | 20      | 95           | 1.9%          | 1.43                | [0.88, 2.33]        |            |  |
| Pathy 1992                                                                                              | 27          | 219          | 31      | 200          | 2.0%          | 0.80                | [0.49, 1.28]        |            |  |
| Counsell 2007                                                                                           | 33          | 474          | 37      | 477          | 2.2%          | 0.90                | [0.57, 1.41]        |            |  |
| Vetter 1984b                                                                                            | 35          | 296          | 60      | 296          | 3.0%          | 0.58                | [0.40, 0.86]        |            |  |
| Vetter 1984a                                                                                            | 45          | 281          | 45      | 273          | 3.1%          | 0.97                | [0.67, 1.42]        |            |  |
| van Rossum 1993                                                                                         | 42          | 292          | 50      | 288          | 3.1%          | 0.83                | [0.57, 1.21]        |            |  |
| Caplan 2004                                                                                             | 55          | 370          | 53      | 369          | 3.6%          | 1.03                | [0.73, 1.47]        |            |  |
| Stuck 2000                                                                                              | 47          | 264          | 67      | 527          | 3.7%          | 1.40                | [0.99, 1.97]        |            |  |
| Pathy 1992                                                                                              | 40          | 150          | 55      | 156          | 3.8%          | 0.76                | [0.54, 1.06]        |            |  |
| Thomas 2007                                                                                             | 89          | 345          | 49      | 175          | 4.8%          | 0.92                | [0.68, 1.24]        |            |  |
| Byles 2004                                                                                              | 115         | 942          | 61      | 627          | 4.9%          | 1.25                | [0.94, 1.68]        |            |  |
| Gunner-Svensson 1984                                                                                    | 449         | 1844         | 443     | 1899         | 21.7%         | 1.04                | [0.93, 1.17]        |            |  |
| <b>Subtotal (95% CI)</b>                                                                                |             | <b>7611</b>  |         | <b>7400</b>  | <b>69.1%</b>  | <b>0.95</b>         | <b>[0.86, 1.05]</b> |            |  |
| Total events: Home visits 1174, Control 1161                                                            |             |              |         |              |               |                     |                     |            |  |
| Heterogeneity: $\tau^2 = 0.01$ ; $\text{Chi}^2 = 31.42$ , $\text{df} = 23$ ( $P = 0.11$ ); $I^2 = 27\%$ |             |              |         |              |               |                     |                     |            |  |
| Test for overall effect: $Z = 0.95$ ( $P = 0.34$ )                                                      |             |              |         |              |               |                     |                     |            |  |
| <b>2.90.3 Both</b>                                                                                      |             |              |         |              |               |                     |                     |            |  |
| Hendriks 2008                                                                                           | 5           | 166          | 1       | 167          | 0.1%          | 5.03                | [0.59, 42.59]       |            |  |
| Newbury 2001                                                                                            | 1           | 50           | 5       | 50           | 0.1%          | 0.20                | [0.02, 1.65]        |            |  |
| Markle-Reid 2010                                                                                        | 3           | 54           | 4       | 55           | 0.2%          | 0.76                | [0.18, 3.25]        |            |  |
| Davison 2005                                                                                            | 3           | 159          | 5       | 154          | 0.2%          | 0.58                | [0.14, 2.39]        |            |  |
| Fabacher 1994                                                                                           | 4           | 131          | 4       | 123          | 0.2%          | 0.94                | [0.24, 3.67]        |            |  |
| Ciaschini 2009                                                                                          | 6           | 101          | 4       | 100          | 0.3%          | 1.49                | [0.43, 5.10]        |            |  |
| Tinetti 1994                                                                                            | 7           | 153          | 5       | 148          | 0.4%          | 1.35                | [0.44, 4.17]        |            |  |
| Lightbody 2002                                                                                          | 11          | 171          | 7       | 177          | 0.5%          | 1.63                | [0.65, 4.10]        |            |  |
| van Haastregt 2000                                                                                      | 10          | 159          | 14      | 157          | 0.8%          | 0.71                | [0.32, 1.54]        |            |  |
| Yamada 2003                                                                                             | 11          | 184          | 15      | 184          | 0.8%          | 0.73                | [0.35, 1.55]        |            |  |
| Close 1999                                                                                              | 19          | 184          | 27      | 213          | 1.5%          | 0.81                | [0.47, 1.42]        |            |  |
| van Hout 2010                                                                                           | 27          | 331          | 31      | 320          | 1.9%          | 0.84                | [0.51, 1.38]        |            |  |
| Gitlin 2006                                                                                             | 34          | 160          | 42      | 159          | 2.8%          | 0.80                | [0.54, 1.19]        |            |  |
| Sahlen 2006                                                                                             | 50          | 248          | 82      | 346          | 4.4%          | 0.85                | [0.62, 1.16]        |            |  |
| Vetter 1992                                                                                             | 88          | 350          | 106     | 324          | 7.1%          | 0.77                | [0.61, 0.98]        |            |  |
| <b>Subtotal (95% CI)</b>                                                                                |             | <b>2601</b>  |         | <b>2677</b>  | <b>21.4%</b>  | <b>0.82</b>         | <b>[0.72, 0.95]</b> |            |  |
| Total events: Home visits 279, Control 352                                                              |             |              |         |              |               |                     |                     |            |  |
| Heterogeneity: $\tau^2 = 0.00$ ; $\text{Chi}^2 = 9.12$ , $\text{df} = 14$ ( $P = 0.82$ ); $I^2 = 0\%$   |             |              |         |              |               |                     |                     |            |  |
| Test for overall effect: $Z = 2.66$ ( $P = 0.008$ )                                                     |             |              |         |              |               |                     |                     |            |  |
| <b>2.90.4 Neither</b>                                                                                   |             |              |         |              |               |                     |                     |            |  |
| Nelson 2004                                                                                             | 1           | 34           | 0       | 38           | 0.0%          | 3.34                | [0.14, 79.42]       |            |  |
| Crawford Shearer 2010                                                                                   | 2           | 27           | 2       | 32           | 0.1%          | 1.19                | [0.18, 7.86]        |            |  |
| Ciechanowski 2004                                                                                       | 3           | 72           | 2       | 66           | 0.2%          | 1.38                | [0.24, 7.97]        |            |  |
| Lenaghan 2007                                                                                           | 7           | 69           | 6       | 67           | 0.4%          | 1.13                | [0.40, 3.20]        |            |  |
| Holland 2005                                                                                            | 49          | 437          | 63      | 435          | 3.6%          | 0.77                | [0.55, 1.10]        |            |  |
| <b>Subtotal (95% CI)</b>                                                                                |             | <b>639</b>   |         | <b>638</b>   | <b>4.3%</b>   | <b>0.84</b>         | <b>[0.61, 1.16]</b> |            |  |
| Total events: Home visits 62, Control 73                                                                |             |              |         |              |               |                     |                     |            |  |
| Heterogeneity: $\tau^2 = 0.00$ ; $\text{Chi}^2 = 1.69$ , $\text{df} = 4$ ( $P = 0.79$ ); $I^2 = 0\%$    |             |              |         |              |               |                     |                     |            |  |
| Test for overall effect: $Z = 1.07$ ( $P = 0.28$ )                                                      |             |              |         |              |               |                     |                     |            |  |
| <b>Total (95% CI)</b>                                                                                   |             |              |         |              |               |                     |                     |            |  |
|                                                                                                         |             | <b>12195</b> |         | <b>12003</b> | <b>100.0%</b> | <b>0.93</b>         | <b>[0.87, 0.99]</b> |            |  |
| Total events: Home visits 1589, Control 1672                                                            |             |              |         |              |               |                     |                     |            |  |
| Heterogeneity: $\tau^2 = 0.00$ ; $\text{Chi}^2 = 54.89$ , $\text{df} = 53$ ( $P = 0.40$ ); $I^2 = 3\%$  |             |              |         |              |               |                     |                     |            |  |
| Test for overall effect: $Z = 2.11$ ( $P = 0.03$ )                                                      |             |              |         |              |               |                     |                     |            |  |
| Test for subgroup differences: $\text{Chi}^2 = 2.72$ , $\text{df} = 3$ ( $P = 0.44$ ); $I^2 = 0\%$      |             |              |         |              |               |                     |                     |            |  |

## Analysis 72: Mortality; age of participants subgroups

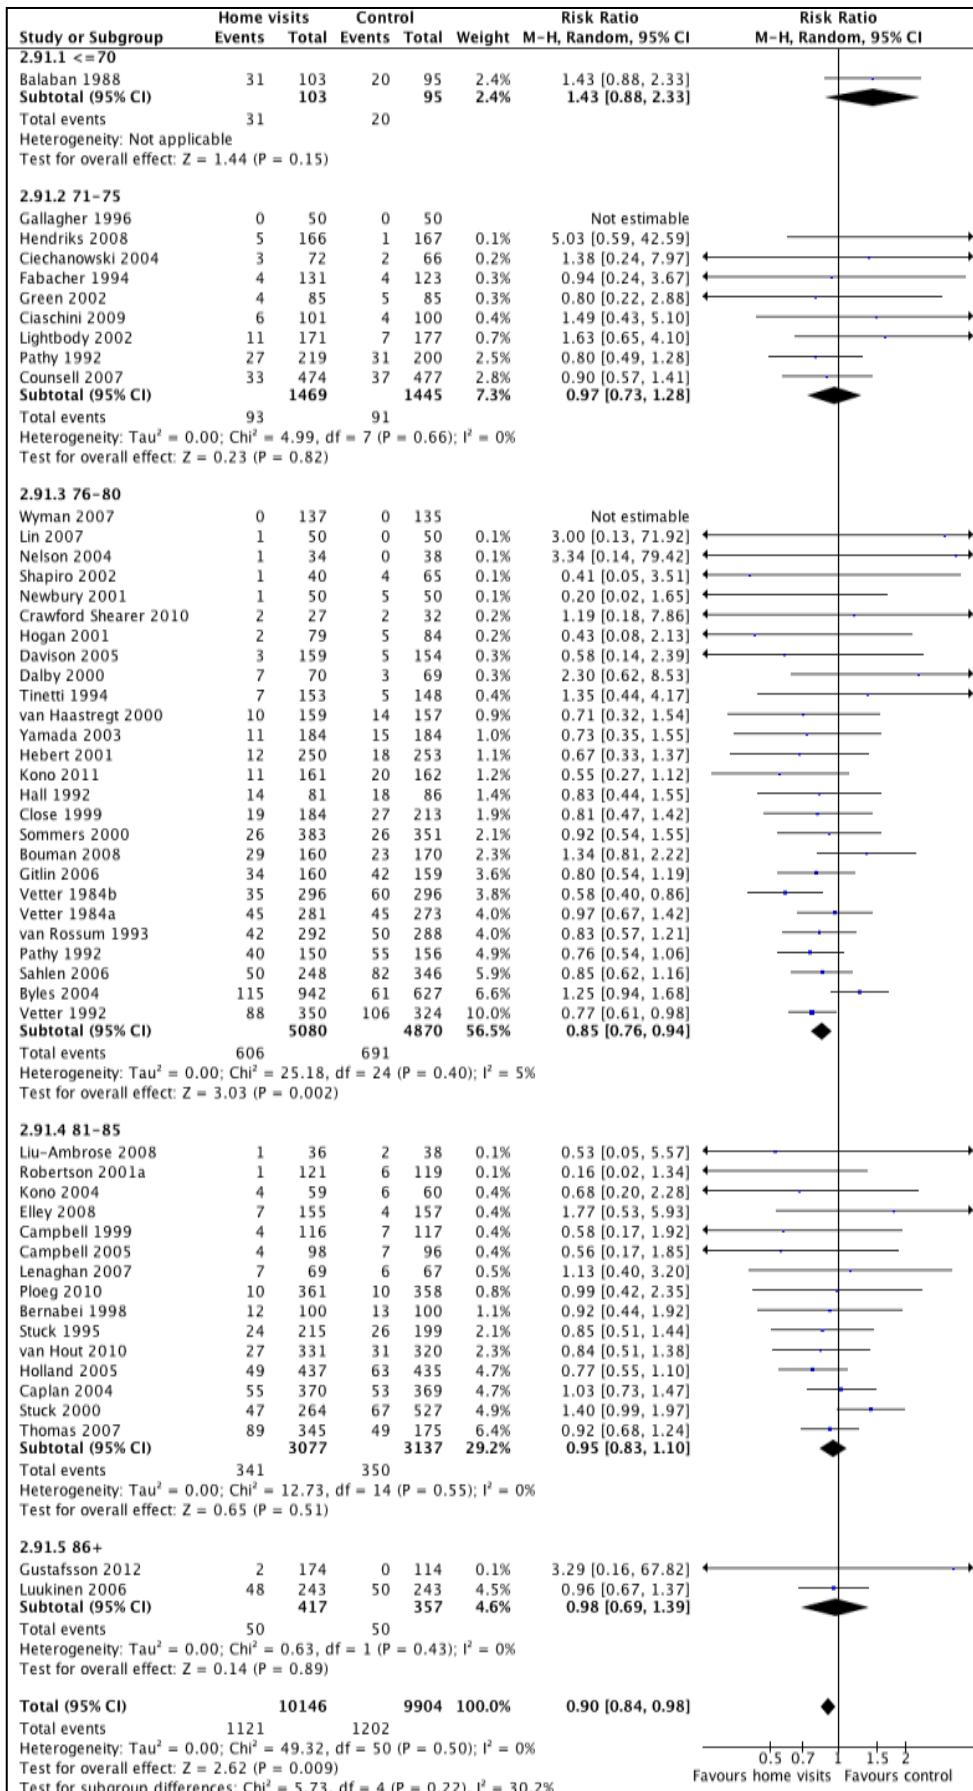

### Analysis 73: Mortality; type of visitor subgroups

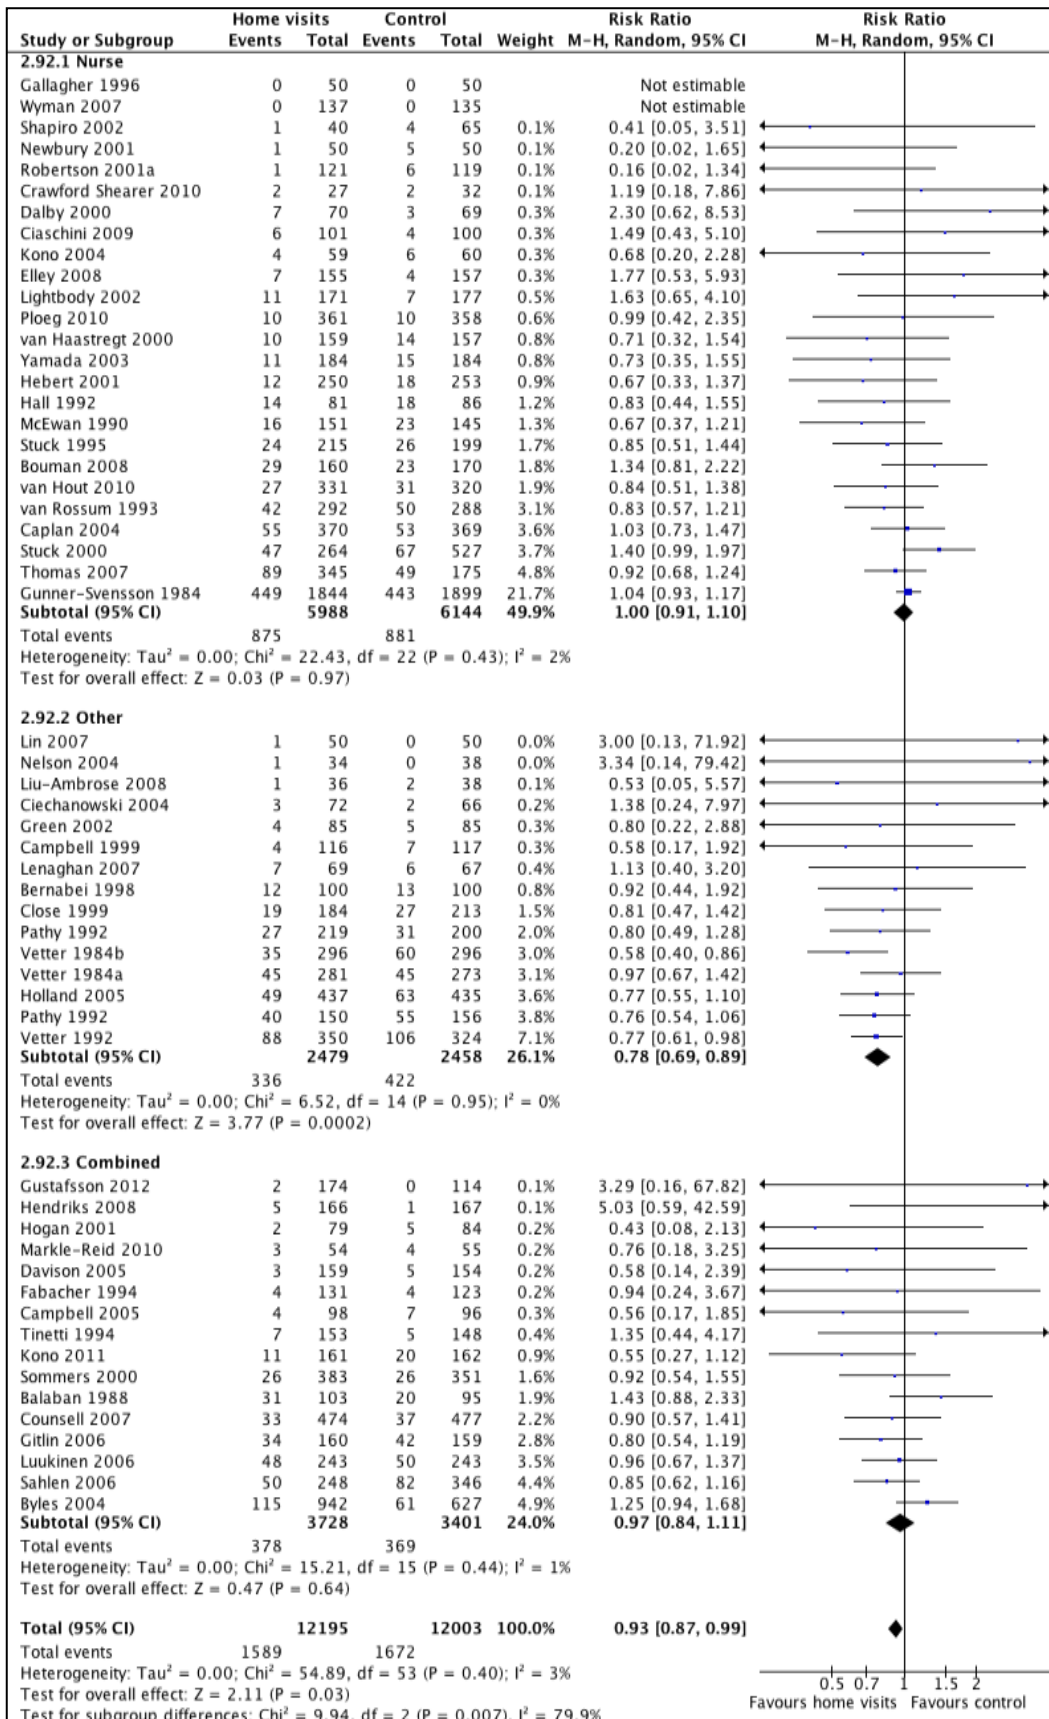

### Analysis 74: Mortality; number of visits subgroups

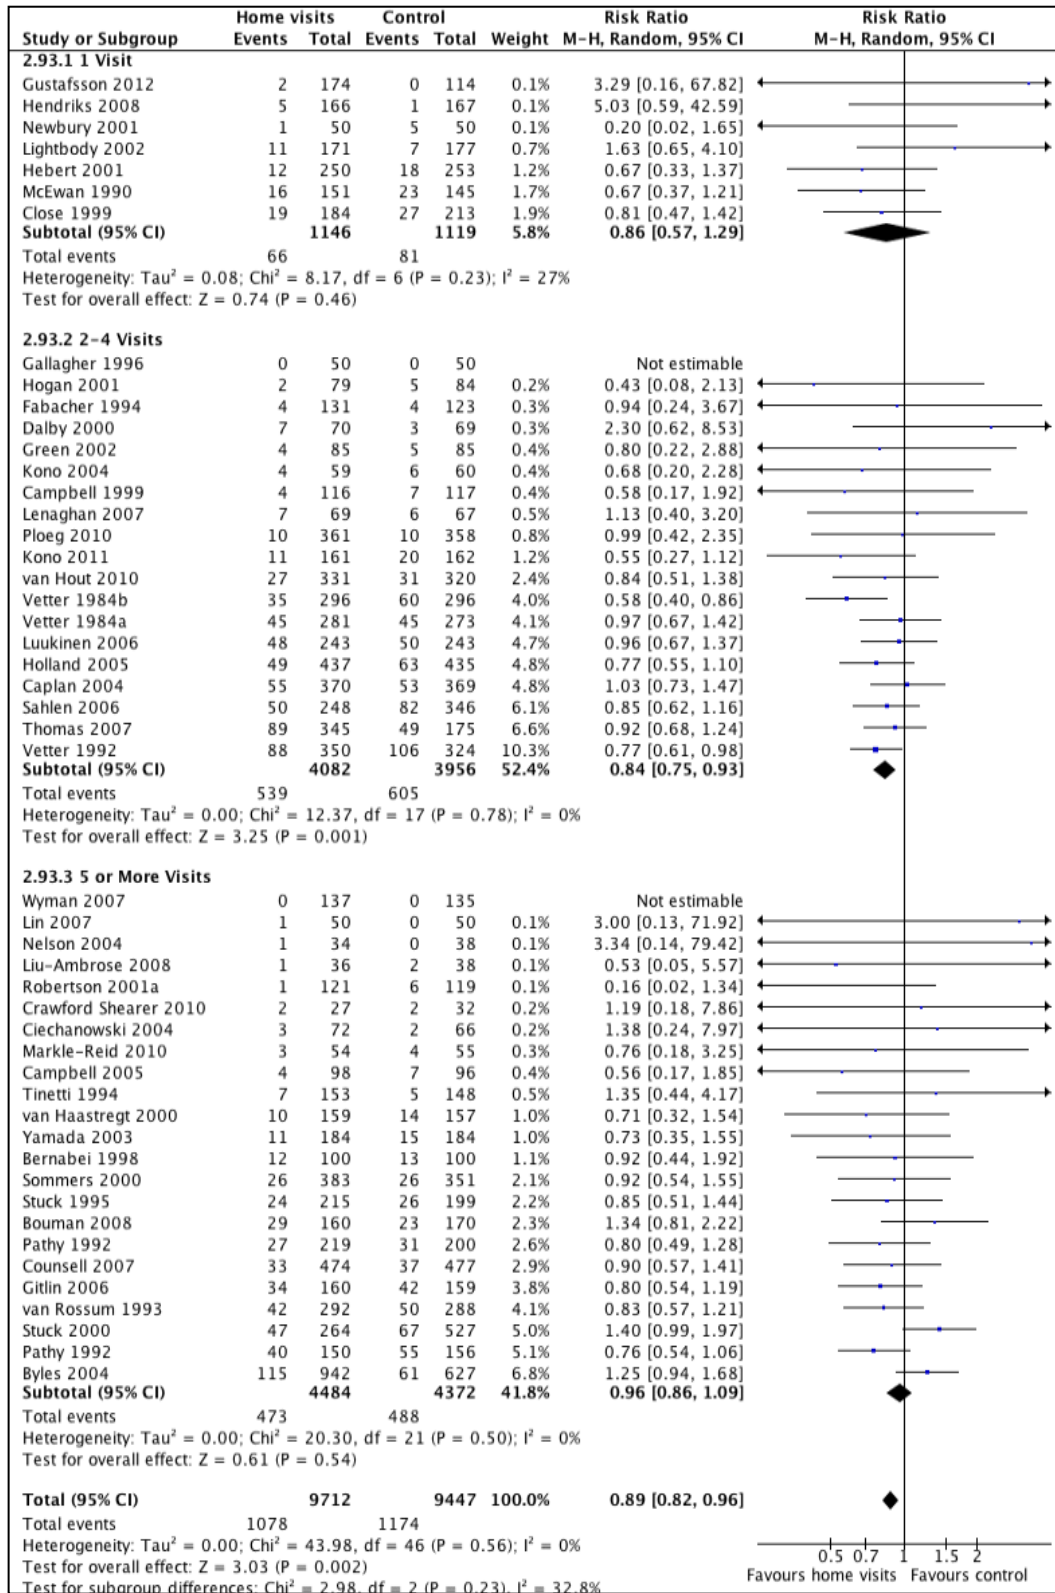

## Analysis 75: Psychiatric (anxiety and depression), results at longest follow-up

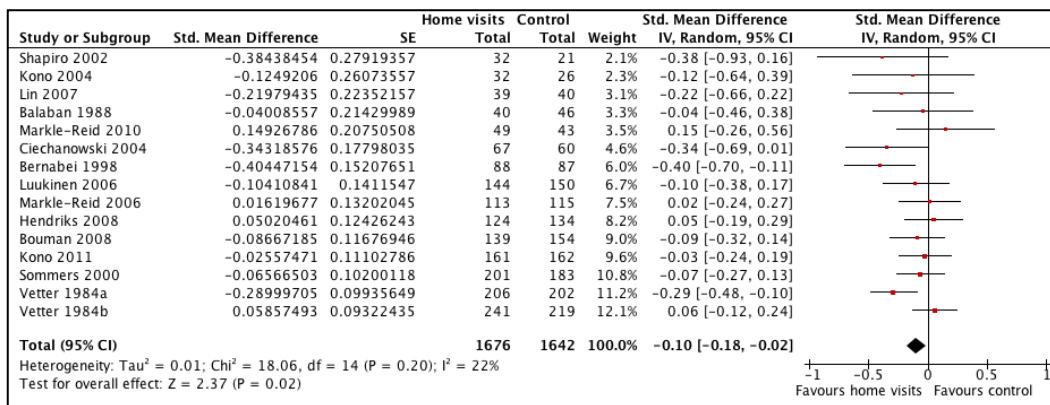

## Analysis 76: Psychiatric (anxiety and depression) at each follow-up interval

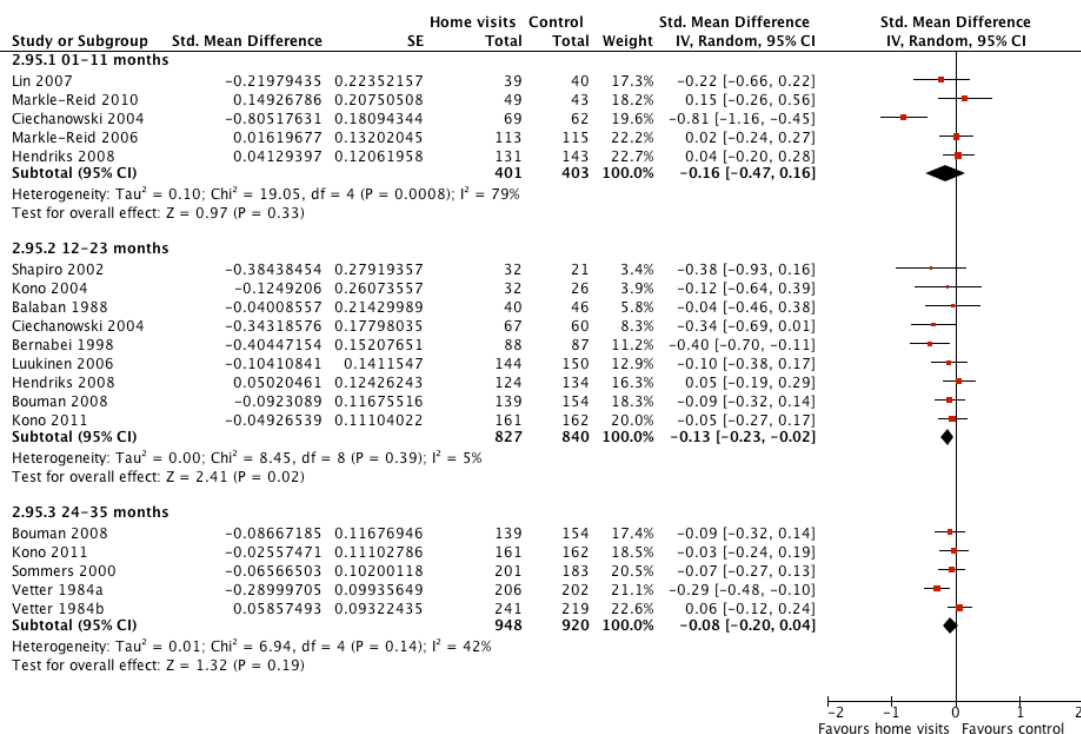

## Analysis 77: Psychiatric (anxiety and depression); focus of visit subgroups

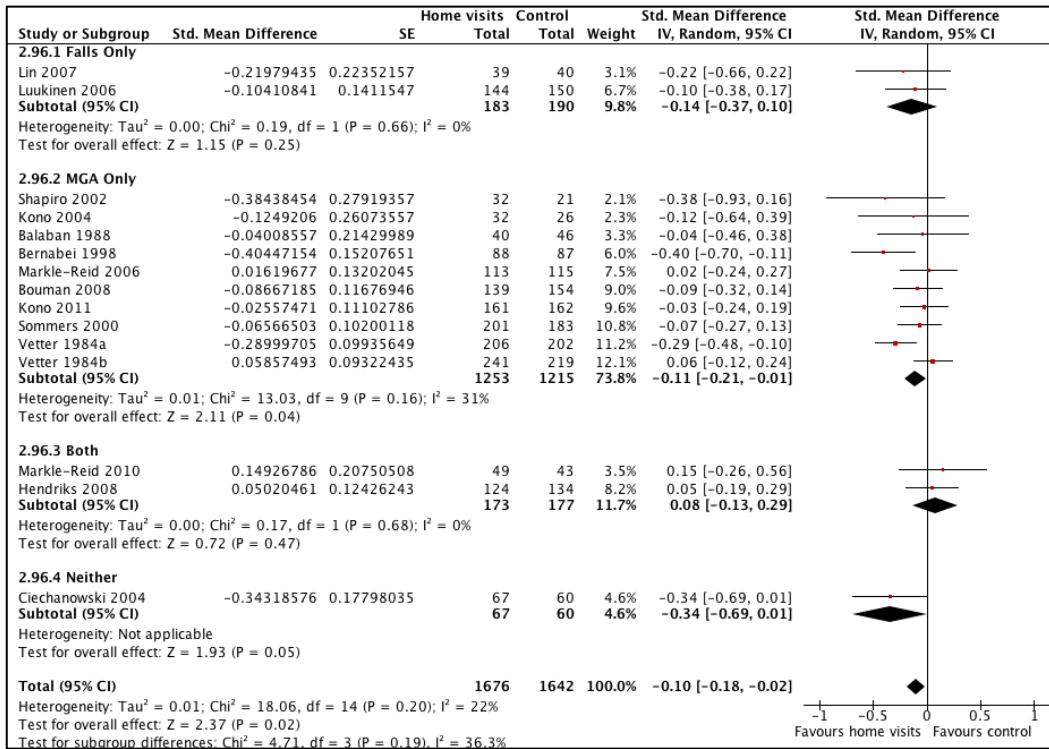

## Analysis 78: Psychiatric (anxiety and depression); age of participants subgroups

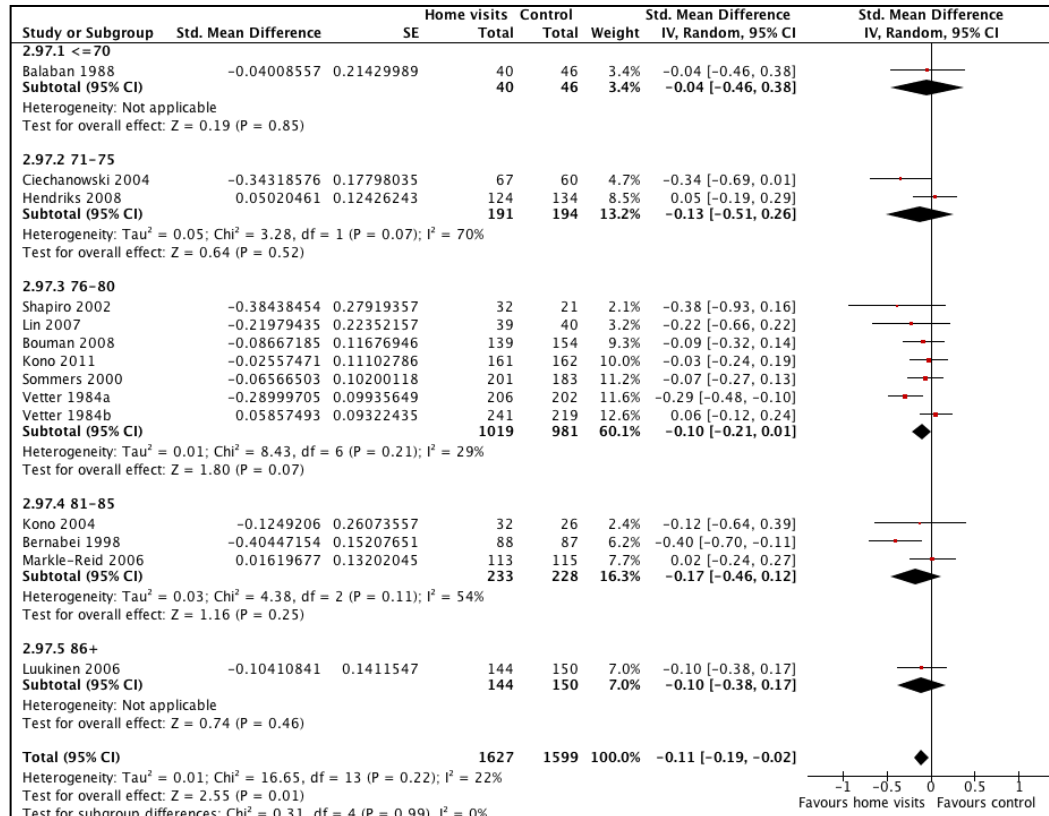



## Analysis 79: Psychiatric (anxiety and depression); type of visitor subgroups

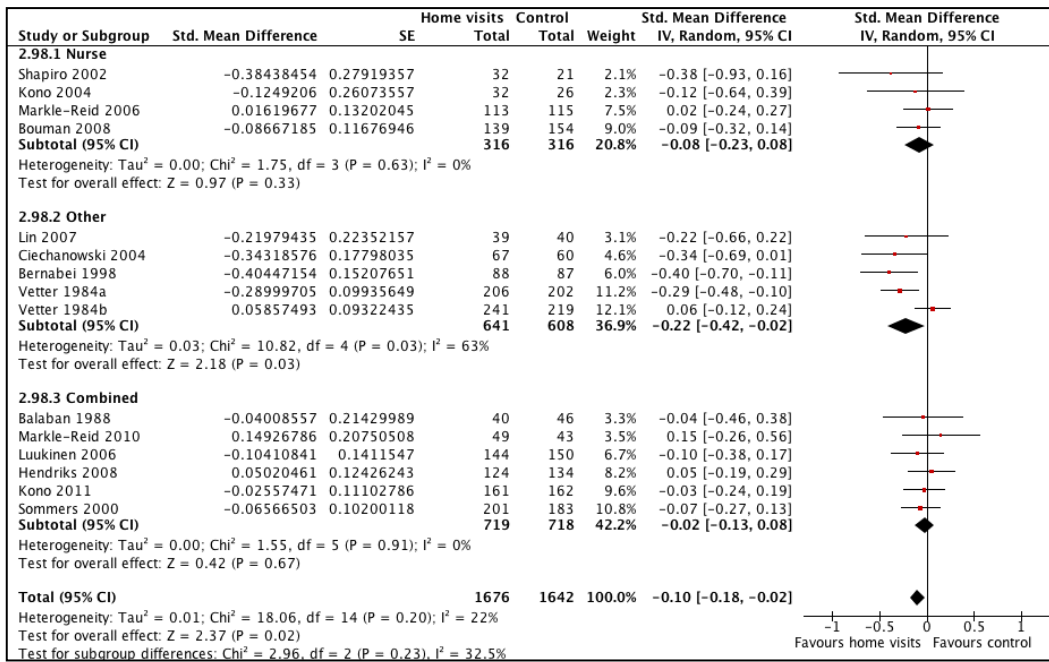

## Analysis 80: Psychiatric (anxiety and depression); number of visits subgroups

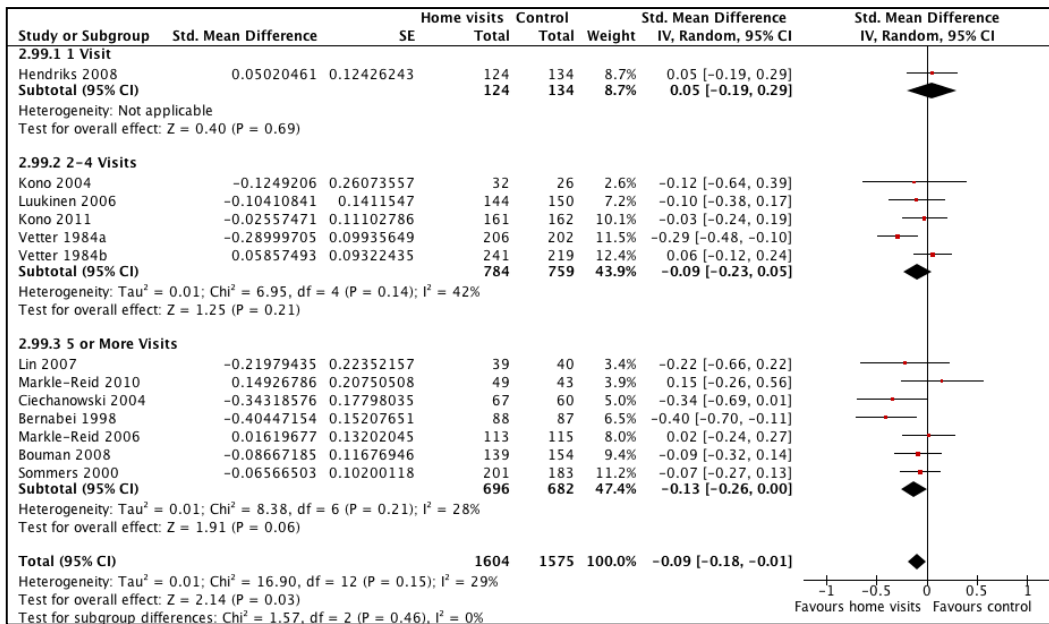

Supplement: pone.0089257.s005.pdf [file pone.0089257.s005.pdf]
